# Supplementary material for: Genetic Variant ABCC1 rs45511401 Is Associated with Increased Response to Statins in Patients with Familial Hypercholesterolemia
Source: MDPI journal article supplement (doi:10.3390/pharmaceutics14050944), 2022-04-27
Supplement: s1 [file s1]

## Supplementary material

**Table S1** Panel of statin PK-related genes sequenced.

| <b>PK-related genes</b>          |
|----------------------------------|
| <b>Drug transporters</b>         |
| <i>ABCB1</i>                     |
| <i>ABCB11</i>                    |
| <i>ABCC1</i>                     |
| <i>ABCC2</i>                     |
| <i>ABCC3</i>                     |
| <i>ABCG2</i>                     |
| <i>SLC15A1</i>                   |
| <i>SLC22A1</i>                   |
| <i>SLC22A6</i>                   |
| <i>SLC22A8</i>                   |
| <i>SLCO1B1</i>                   |
| <i>SLCO1B3</i>                   |
| <i>SLCO2B1</i>                   |
| <b>Drug-metabolizing enzymes</b> |
| <i>CYP1A2</i>                    |
| <i>CYP2C19</i>                   |
| <i>CYP2C8</i>                    |
| <i>CYP2C9</i>                    |
| <i>CYP2D6</i>                    |
| <i>CYP3A4</i>                    |
| <i>CYP3A5</i>                    |
| <i>UGT1A1</i>                    |
| <i>UGT1A3</i>                    |
| <i>UGT2B7</i>                    |

**Table S2** Clinical data of FH patients classified according to CAD risk.

|                                  |             | Total<br>(n=114) | CAD risk <sup>a</sup> |                  |                          | <i>p value</i> |
|----------------------------------|-------------|------------------|-----------------------|------------------|--------------------------|----------------|
|                                  |             |                  | Very high<br>(n = 64) | High<br>(n = 11) | Intermediate<br>(n = 39) |                |
| High risk factors                |             |                  |                       |                  |                          |                |
| Gender                           | Male        | 28.1 (32)        | 34.4% (22)            | 36.4% (4)        | 15.4% (6)                | 0.093          |
| Medical history <sup>b</sup> , % | AMI         | 29.2 (33)        | 51.6 (33)             | 0.0 (0)          | 0.0 (0)                  | <0.001         |
|                                  | CAD         | 40.0 (42)        | 70.0 (42)             | 0.0 (0)          | 0.0 (0)                  | <0.001         |
|                                  | CVE         | 6.0 (6)          | 10.3 (6)              | 0.0 (0)          | 0.0 (0)                  | 0.099          |
|                                  | Angina      | 40.6 (41)        | 69.5 (41)             | 0.0 (0)          | 0.0 (0)                  | <0.001         |
|                                  | MR          | 30.9 (34)        | 54.8 (34)             | 0.0 (0)          | 0.0 (0)                  | <0.001         |
| Tobacco smoking <sup>b</sup> , % |             | 14.3 (16)        | 19.4 (12)             | 27.3 (3)         | 2.6 (1)                  | 0.027          |
| Therapy factors                  |             |                  |                       |                  |                          |                |
| LDL-c absolute target, %         | <50 mg/dL   | 2.6 (3)          | 0.0 (0)               | 18.2 (2)         | 2.6 (1)                  | 0.002          |
|                                  | <70 mg/dL   | 9.6 (11)         | 9.4 (6)               | 18.2 (2)         | 7.7 (3)                  | 0.578          |
|                                  | < 100 mg/dL | 34.2 (39)        | 31.2 (20)             | 27.3 (3)         | 41.0 (16)                | 0.525          |
| LDL-c reduction ≥ 50%            |             |                  | 81.8 (9)              | 48.4 (31)        | 46.2 (18)                | 0.095          |
| TT reached <sup>c</sup> , %      |             | 12.3 (14)        | 0.0 (0)               | 18.2 (2)         | 30.8 (12)                | <0.001         |

Number of patients in brackets. Categorical variables were compared by chi-square test. AMI: acute myocardial infarction; CAD: coronary artery disease; CVE: cerebrovascular event; LDL-c: low-density lipoprotein cholesterol; MR: myocardial revascularization; TT: therapy target.

<sup>a</sup> The stratification of CAD risk was performed according to the Update of the Brazilian Guideline for FH (IZAR et al., 2021):

- 1) Very high risk: patients carrying manifested CAD (history of AMI, angina *pectoris*, previous myocardial revascularization or ischemic or transitory CVE);
- 2) High risk: primary prevention with baseline LDL-c > 400 mg/dL, or baseline LDL-c > 310 mg/dL with one high risk factor (tobacco smoking, male gender or HDL-c < 40 mg/dL), or baseline LDL-c > 190 mg/dL with two high risk factors;
- 3) Intermediate risk: Primary prevention without high risk factors.

<sup>b</sup> Data were not available for history of AMI (1), CAD (9), CVE (14), tobacco smoking (2).

<sup>c</sup> The therapy target for each risk group was the following:

- 1) Very high risk: LDL-c reduction ≥ 50% + on-treatment LDL-c < 50 mg/dL;
- 2) High risk: LDL-c reduction ≥ 50% + on-treatment LDL-c < 70 mg/dL;
- 3) Intermediate risk: LDL-c reduction ≥ 50% + on-treatment LDL-c < 70 mg/dL.

**Table S3** Influence of lipid-lowering treatment on serum lipids of FH patients.

| Variable                    |                | Total<br>(n=114) | RE<br>(n=58)     | NRE<br>(n=56)    | p-value          |
|-----------------------------|----------------|------------------|------------------|------------------|------------------|
| Total cholesterol,<br>mg/dL | Baseline       | 318 (216 - 420)  | 330 (173 - 487)  | 300 (247 - 353)  | <b>0.004</b>     |
|                             | On-treatment   | 197 (133 - 261)  | 176 (122 - 230)  | 230 (170 - 290)  | <b>&lt;0.001</b> |
|                             | % change       | -36 (-61 - -11)  | -51 (-65 - -37)  | -25 (-40 - -10)  | <b>&lt;0.001</b> |
|                             | <b>p-value</b> | <b>&lt;0.001</b> | <b>&lt;0.001</b> | <b>&lt;0.001</b> |                  |
| LDL cholesterol,<br>mg/dL   | Baseline       | 226 (128 - 324)  | 239 (100 - 378)  | 222 (171 - 273)  | <b>0.005</b>     |
|                             | On-treatment   | 118 (51 - 185)   | 96 (60 - 132)    | 152 (104 - 200)  | <b>&lt;0.001</b> |
|                             | % change       | -51 (-81 - -21)  | -62 (-76 - -48)  | -32 (-50 - -13)  | <b>&lt;0.001</b> |
|                             | <b>p-value</b> | <b>&lt;0.001</b> | <b>&lt;0.001</b> | <b>&lt;0.001</b> |                  |
| HDL cholesterol,<br>mg/dL   | Baseline       | 49 (35 - 63)     | 50 (34 - 66)     | 48 (35 - 61)     | 0.711            |
|                             | On-treatment   | 47 (30 - 64)     | 44 (26 - 62)     | 48 (35 - 61)     | 0.473            |
|                             | % change       | 0 (-26 - 26)     | -6 (-31 - 19)    | 0 (-22 - 22)     | 0.230            |
|                             | <b>p-value</b> | 0.619            | 0.268            | 0.546            |                  |
| Triglycerides,<br>mg/dL     | Baseline       | 154 (52 - 256)   | 150 (18 - 282)   | 154 (80 - 228)   | 0.511            |
|                             | On-treatment   | 122 (43 - 201)   | 105 (12 - 198)   | 130 (53 - 207)   | 0.073            |
|                             | % change       | -24 (-72 - 24)   | -31 (-68 - 6)    | -13 (-57 - 31)   | <b>0.003</b>     |
|                             | <b>p-value</b> | <b>&lt;0.001</b> | <b>&lt;0.001</b> | <b>0.010</b>     |                  |

Patients with LDL-c reduction of at least 50% after statin treatment were classified as responders. Continuous variables are shown as median and interquartile range and were compared by Mann-Whitney or Wilcoxon test. . n: number of patients; HDL: high-density lipoprotein; LDL: low-density lipoprotein; RE: responder; NRE non responder.

**Table S4** Concentration of laboratory variables on treatment in FH patients grouped according to statin response.

| Variable          | Total<br>(n=113)    | RE<br>(n=58)        | NRE<br>(n=56)      | <i>p-value</i> |
|-------------------|---------------------|---------------------|--------------------|----------------|
| Apo AI, mg/dL     | 147 (112 - 182)     | 142 (105 - 178)     | 153 (121 - 185)    | <b>0.036</b>   |
| Apo B, mg/dL      | 125 (73 - 177)      | 119 (75 - 163)      | 150 (93 - 207)     | <b>0.007</b>   |
| Glucose, mg/dL    | 92 (73 - 111)       | 89 (76 - 102)       | 95 (74 - 116)      | <b>0.004</b>   |
| HbA1c, %          | 6 (5.3 - 6.7)       | 6.0 (5.2 - 6.8)     | 5.9 (5.2 - 6.6)    | 0.617          |
| Creatinine, mg/dL | 0.8 (0.6 - 1)       | 0.8 (0.6 - 1)       | 0.7 (0.4 - 1)      | 0.075          |
| ALT, U/L          | 32 (11 - 53)        | 32 (12 - 52)        | 31.5 (11.3 - 51.7) | 0.446          |
| AST, U/L          | 26 (16 - 36)        | 28 (17 - 39)        | 24.5 (15.5 - 33.5) | 0.221          |
| CK, U/L           | 91.5 (12.3 - 170.7) | 94.5 (34.5 - 154.5) | 88.5 (6.3 - 170.7) | 0.924          |
| TSH, $\mu$ IU/mL  | 1.6 (0.1 - 3.1)     | 1.5 (-0.2 - 3.2)    | 1.7 (0.5 - 2.9)    | 0.899          |
| T4, ng/dL         | 1.0 (0.8 - 1.2)     | 1.0 (0.8 - 1.2)     | 0.9 (0.7 - 1.1)    | 0.680          |

Patients with LDL-c reduction of at least 50% after statin treatment were classified as responders. Continuous variables are shown as median and interquartile range and were compared by Mann-Whitney test. Information on laboratory data was missing for apo AI (33 patients), apo B (33), glucose (17), HbA1c (27), creatinine (27), ALT (25), AST (25), CK (24), TSH (23) and T4 (25). n: number of patients; ALT: alanine aminotransferase; Apo AI: apolipoprotein AI; Apo B: apolipoprotein B; AST: aspartate aminotransferase; CK: creatine kinase; HbA1c: glycated hemoglobin; HDL: high-density lipoprotein; LDL: low-density lipoprotein; T4: thyroxine; TSH: thyroid-stimulating hormone; RE: responder; NRE non responder.

**Table S5** Influence of the type of lipid-lowering treatments on lipid levels of FH patients (n=114).

| Variable     |                | Statin intensity   |                 |                | Ezetimibe           |                 |                |
|--------------|----------------|--------------------|-----------------|----------------|---------------------|-----------------|----------------|
|              |                | Moderate<br>(n=16) | High<br>(n=98)  | <i>p-value</i> | Non-users<br>(n=72) | Users<br>(n=42) | <i>p-value</i> |
| <b>TC</b>    | Baseline       | 306 (253-359)      | 322 (213-431)   | 0.109          | 304 (239-369)       | 333 (204-462)   | 0.011          |
|              | On-treatment   | 232 (160-304)      | 192 (125-259)   | 0.011          | 203 (121-285)       | 188 (137-239)   | 0.362          |
|              | % change       | -22 (-40 – -4)     | -40 (-65 – -15) | <0.001         | -34 (-53 – -15)     | -47 (-74 – -20) | 0.031          |
|              | <i>p-value</i> | <0.001             | <0.001          |                | <0.001              | <0.001          |                |
| <b>LDL-c</b> | Baseline       | 222 (149-295)      | 230 (123-337)   | 0.071          | 221 (169-273)       | 244 (142-346)   | 0.001          |
|              | On-treatment   | 130 (68-192)       | 116 (58 - 174)  | 0.116          | 117 (49-185)        | 122 (65-179)    | 0.936          |
|              | % change       | -32 (-56 – -8)     | -53 (-72 – -31) | 0.002          | -47 (-73 – -21)     | -61 (-88 – -34) | 0.009          |
|              | <i>p-value</i> | <0.001             | <0.001          |                | <0.001              | <0.001          |                |
| <b>HDL-c</b> | Baseline       | 52 (44-60)         | 48 (33 - 63)    | 0.103          | 49 (34-64)          | 49 (34-64)      | 0.342          |
|              | On-treatment   | 53 (36-70)         | 46 (29-63)      | 0.086          | 45 (29-61)          | 48 (32-64)      | 0.374          |
|              | % change       | -6 (-38 - 26)      | 0 (-23 - 23)    | 0.003          | -1 (-26 - 24)       | 0 (-24 - 24)    | 0.764          |
|              | <i>p-value</i> | 1.000              | 0.680           |                | 0.837               | 0.581           |                |
| <b>TG</b>    | Baseline       | 162 (100-224)      | 154 (42 - 66)   | 0.831          | 157 (41-273)        | 142 (41-243)    | 0.464          |
|              | On-treatment   | 157 (73-241)       | 110 (34-186)    | 0.004          | 130 (30-230)        | 108 (38-178)    | 0.085          |
|              | % change       | -4 (-39 - 31)      | -27 (-75 - 21)  | 0.001          | -24 (-68-20)        | -24 (-75-27)    | 0.438          |
|              | <i>p-value</i> | 0.391              | <0.001          |                | <0.001              | <0.001          |                |

Continuous variables are shown as median and interquartile range and were compared by Mann-Whitney test. FH: familial hypercholesterolemia; HDL-c: high-density lipoprotein cholesterol; LDL-c: low-density lipoprotein cholesterol; TC: total cholesterol; TG: triglycerides.

**Table S6** Biodemographic characteristics of FH patients with SRAE (n=114).

| Variable <sup>a</sup>                  |                                           | Total (114)      | No SRAE (90)       | SRAE (24)          | p-value |
|----------------------------------------|-------------------------------------------|------------------|--------------------|--------------------|---------|
| Age, years                             |                                           | 57.1 (37.9-76.3) | 57.3 (38.3 - 76.3) | 56.9 (38.9 - 74.9) | 0.830   |
| Gender (female), %                     |                                           | 71.9 (82)        | 72.2 (65)          | 70.8 (17)          | 1.000   |
| Ethnics, %                             | White                                     | 53.5 (54)        | 53.2 (41)          | 54.2 (13)          | 0.538   |
|                                        | Brown                                     | 31.7 (31)        | 29.9 (23)          | 37.5 (9)           |         |
|                                        | Black                                     | 14.9 (15)        | 16.9 (13)          | 8.3 (2)            |         |
| Xanthomas, %                           |                                           | 12.3 (14)        | 6.7 (6)            | 33.3 (8)           | 0.002   |
| Arcus cornealis, %                     |                                           | 17.9 (20)        | 16.9 (15)          | 21.7 (5)           | 0.810   |
| FH clinical diagnosis <sup>b</sup> , % | Definite or probable                      | 68.4 (78)        | 64.4 (58)          | 83.3 (20)          | 0.128   |
|                                        | Possible                                  | 31.6 (36)        | 35.6 (32)          | 16.7 (4)           |         |
| FH molecular diagnosis, %              | FH variants                               | 30.7 (35)        | 24.4 (22)          | 54.2 (13)          | 0.011   |
|                                        | <i>APOB</i>                               | 0.9 (1)          | 0.0 (0)            | 4.2 (1)            |         |
|                                        | <i>LDLR</i>                               | 28.3 (32)        | 22.2 (20)          | 50.0 (12)          |         |
|                                        | <i>PCSK9</i>                              | 1.8 (2)          | 2.2 (2)            | 0.0 (0)            |         |
|                                        | <i>LDLRAP1</i>                            | 0.0 (0)          | 0.0 (0)            | 0.0 (0)            |         |
| Hypertension, %                        |                                           | 62.5 (70)        | 61.4 (54)          | 66.7 (16)          | 0.812   |
| Type 2 diabetes, %                     |                                           | 21.6 (24)        | 18.4 (16)          | 33.3 (8)           | 0.196   |
| Obesity, %                             |                                           | 28.6 (32)        | 33.0 (29)          | 12.5 (3)           | 0.087   |
| BMI, kg/cm <sup>2</sup>                |                                           | 27.7 (22.5-32.9) | 27.9 (22 - 33.8)   | 25.9 (22.1 - 29.7) | 0.126   |
| Medical history, %                     | AMI                                       | 29.2 (33)        | 28.9 (26)          | 30.4 (7)           | 1.000   |
|                                        | CAD                                       | 40.0 (42)        | 36.5 (31)          | 55.0 (11)          | 0.205   |
|                                        | CVE                                       | 6.0 (6)          | 6.4 (5)            | 4.5 (1)            | 1.000   |
| Alcohol consumption, %                 |                                           | 25.0 (22)        | 28.8 (19)          | 13.6 (3)           | 0.281   |
| Tobacco smoking, %                     |                                           | 14.3 (16)        | 14.8 (13)          | 12.5 (3)           | 0.918   |
| Lipid-lowering treatment, %            | Atorvastatin                              | 79.8 (91)        | 83.3 (75)          | 66.7 (16)          | 0.192   |
|                                        | Simvastatin                               | 10.5 (12)        | 8.9 (8)            | 16.7 (4)           |         |
|                                        | Rosuvastatin                              | 9.6 (11)         | 7.8 (7)            | 16.7 (4)           |         |
|                                        | Statins + Eze                             | 36.8 (42)        | 33.3 (30)          | 50.0 (12)          |         |
| Statin intensity, %                    | Moderate                                  | 14.0 (16)        | 15.6 (14)          | 8.3 (2)            | 0.566   |
|                                        | High                                      | 86.0 (98)        | 84.4 (76)          | 91.7 (22)          |         |
| Statin response                        | RE                                        | 50.9 (58)        | 42.2 (38)          | 83.3 (20)          | 0.001   |
|                                        | NRE                                       | 49.1 (56)        | 57.8 (52)          | 16.7 (4)           |         |
| Drug interactions                      | CYP3A4 inhibitors <sup>c</sup>            | 10 (8.8)         | 5.6 (5)            | 20.8 (5)           | 0.052   |
|                                        | CYP3A4 inhibitors + inducers <sup>d</sup> | 1 (0.01)         | 0 (0.0)            | 1.0 (1.9)          |         |
|                                        |                                           |                  |                    |                    |         |
| Reduced adherence, %                   | Statins                                   | 15.9 (18)        | 10.1 (9)           | 37.5 (9)           | 0.003   |
|                                        | Ezetimibe                                 | 10.6 (12)        | 5.6 (5)            | 29.2 (7)           | 0.003   |

Number of patients in brackets. SRAE, group included patients that experienced all SRAE, including myalgia (19), stomach pain (4), diarrhea (1), urinary tract infection (1), increased hepatic enzymes (1) and joint pain (1).

Categorical variables were compared by chi-square test. Continuous variables are shown as median and interquartile range and were compared by Mann-Whitney test. AMI: acute myocardial infarction; BMI: body mass index; CAD: coronary artery disease; CVE: cerebrovascular event; Eze: ezetimibe; NRE: non responder; RE: responder; SRAE: statin-related adverse events

<sup>a</sup> Data were not available for ethnics (13 patients), *arcus cornealis* (2), hypertension (2), diabetes (3), BMI (4), obesity (2), history of infarction (1), CAD (9), CVE (14), tobacco smoking (2), alcohol consumption (26), age (2). <sup>b</sup> DCLN modified criteria. <sup>c</sup> All patients in this category used the CYP3A4 inhibitor amlodipine. <sup>d</sup> All patients in this category used the CYP3A4 inhibitor amlodipine and the CYP3A4 inducer carbamazepine.

**Table S7** Association between SRAE and serum lipids of FH patients (n=114).

| Variable |                | No SRAE<br>(90)       | SRAE<br>(24)          | <i>p-value</i> |
|----------|----------------|-----------------------|-----------------------|----------------|
| TC       | Baseline       | 310 (245 - 376)       | 374 (239 - 509)       | <b>0.001</b>   |
|          | On-treatment   | 192 (111 - 273)       | 204 (163 - 245)       | <b>0.001</b>   |
|          | % change       | -33.4 (-12.7 - -54.1) | -50.0 (-36.6 - -63.4) | <b>0.001</b>   |
|          | <i>p-value</i> | <b>&lt;0.001</b>      | <b>&lt;0.001</b>      |                |
| LDL-c    | Baseline       | 224 (169 - 279)       | 295 (140 - 449)       | <b>0.007</b>   |
|          | On-treatment   | 117 (47 - 187)        | 121 (78 - 165)        | 0.784          |
|          | % change       | -47.3 (-20.1 - -74.5) | -61.3 (-51.8 - -70.8) | <b>0.002</b>   |
|          | <i>p-value</i> | <b>&lt;0.001</b>      | <b>&lt;0.001</b>      |                |
| HDL-c    | Baseline       | 49 (35 - 63)          | 51 (30.5 - 71.5)      | 0.352          |
|          | On-treatment   | 47 (34 - 60)          | 46.5 (20.5 - 72.5)    | 0.833          |
|          | % change       | 0 (-26.3 - 26.3)      | -6.6 (-20.9 - 7.7)    | 0.325          |
|          | <i>p-value</i> | 0.824                 | 0.523                 |                |
| TG       | Baseline       | 154 (60.8 - 247.2)    | 191 (41.5 - 340.5)    | 0.242          |
|          | On-treatment   | 119 (49 - 189)        | 142 (17 - 267)        | 0.385          |
|          | % change       | -24.2 (-70.4 - 22.0)  | -28.9 (- 91.3 - 33.5) | 0.985          |
|          | <i>p-value</i> | <b>&lt;0.001</b>      | 0.279                 |                |

Continuous variables are shown as median and interquartile range and were compared by Mann-Whitney test. FH: familial hypercholesterolemia; HDL-c: high-density lipoprotein cholesterol; LDL-c: low-density lipoprotein cholesterol; TC: total cholesterol; TG: triglycerides; SRAE: statin-related adverse events.

**Table S8** Variants in PK-related genes identified in FH patients (n=114).

| Gene          | rs code     | NT change              | AA change    | Type                | MAF (%) | <i>In silico</i> prediction | HWE p-value |
|---------------|-------------|------------------------|--------------|---------------------|---------|-----------------------------|-------------|
| <i>ABCB1</i>  | rs2032582   | c.2677T>G              | p.Ser893Ala  | missense            | 59.2    | N                           | 0.247       |
|               | rs28364277  | c.*146G>A              |              | 3'UTR               | 3.1     | N                           | 1.000       |
|               | rs2229107   | c.3421T>A              | p.Ser1141Thr | missense            | 1.3     | N                           | 1.000       |
|               | rs2235052   | c.*82_*79delTTAC       |              | 3'UTR               | 2.2     | N                           | 1.000       |
|               | rs17064     | c.*89A>T               |              | 3'UTR               | 7.9     | N                           | 1.000       |
|               | rs3842      | c.*193A>G              |              | 3'UTR               | 12.3    | N                           | 0.213       |
|               | rs9282564   | c.61A>G                | p.Asn21Asp   | missense            | 3.9     | N                           | 1.000       |
|               | rs3213619   | c.-693T>C              |              | 5'UTR               | 4.8     | N                           | 0.224       |
|               | rs3747802   | c.-113086T>C           |              | 5'UTR               | 0.9     | N                           | 1.000       |
|               | rs28364275  | c.*21T>C               |              | 3'UTR               | 1.8     | N                           | 1.000       |
|               | rs28364278  | c.*172_*173insGAGAGACA |              | 3'UTR               | 1.8     | N                           | 1.000       |
|               | rs35023033  | c.2005C>T              | p.Arg669Cys  | missense            | 0.4     | N                           | 1.000       |
|               | rs35730308  | c.3322T>C              | p.Trp1108Arg | missense            | 0.4     | N                           | 1.000       |
|               | rs28364274  | c.3751G>A              | p.Val1251Ile | missense            | 0.9     | N                           | 1.000       |
|               | rs57521326  | c.3262G>A              | p.Asp1088Asn | missense            | 0.9     | N                           | 1.000       |
|               | rs28364279  | c.*252A>C              |              | 3'UTR               | 0.4     | N                           | 1.000       |
|               | rs28364280  | c.*316G>A              |              | 3'UTR               | 0.4     | N                           | 1.000       |
|               | rs36008564  | c.781A>G               | p.Ile261Val  | missense            | 0.4     | N                           | 1.000       |
| <i>ABCB11</i> | rs2287622   | c.1331T>C              | p.Val444Ala  | missense            | 58.7    | N                           | <0.001      |
|               | rs473351    | c.*236A>G              |              | 3'UTR               | 63.6    | N                           | 0.009       |
|               | rs495714    | c.*368G>A              |              | 3'UTR               | 56.0    | N                           | 0.037       |
|               | rs496550    | c.*420A>G              |              | 3'UTR               | 56.0    | N                           | 0.037       |
|               | rs11568364  | c.2029A>G              | p.Met677Val  | missense            | 5.4     | N                           | 1.000       |
|               | rs1521808   | c.3556G>A              | p.Glu1186Lys | missense            | 0.5     | N                           | 1.000       |
|               | rs766285158 | c.3691C>T              | p.Arg1231Trp | missense            | 0.5     | N                           | 1.000       |
|               | Novel       | c.*614G>A              |              | 3'UTR               | 0.5     | N                           | 1.000       |
|               | rs11568357  | c.616A>G               | p.Ile206Val  | missense            | 0.5     | N                           | 1.000       |
|               | rs111482608 | c.1636C>A              | p.Gln546Lys  | missense            | 0.5     | N                           | 1.000       |
| <i>ABCC1</i>  | rs11568370  | c.1774G>C              | p.Glu592Gln  | missense            | 0.5     | N                           | 1.000       |
|               | rs129081    | c.*801G>C              |              | 3'UTR               | 40.2    | N                           | 0.034       |
|               | rs3743527   | c.*543C>T              |              | 3'UTR               | 21.2    | N                           | 0.093       |
|               | rs4148381   | c.*1321_*1322insT      |              | 3'UTR               | 51.1    | N                           | 0.000       |
|               | rs8056298   | c.*1385T>G             |              | 3'UTR               | 97.8    | N                           | <0.001      |
|               | rs212090    | c.*866T>A              |              | 3'UTR               | 40.2    | N                           | 0.011       |
|               | rs113264879 | c.*883G>A              |              | 3'UTR               | 0.5     | N                           | 1.000       |
|               | rs16967632  | c.*1645G>A             |              | 3'UTR               | 0.5     | N                           | 1.000       |
|               | rs142023064 | c.*1293_*1297delGAAAA  |              | 3'UTR               | 2.2%    | N                           | 1.000       |
|               | rs150927043 | c.*1759T>A             |              | 3'UTR               | 1.6     | N                           | 1.000       |
|               | rs4148381   | c.*1321_*1322insTT     |              | 3'UTR               | 30.2    | N                           | 0.802       |
|               | rs212091    | c.*1512T>C             |              | 3'UTR               | 11.4    | N                           | 0.006       |
|               | rs4148356   | c.2168G>A              | p.Arg723Gln  | missense            | 0.5     | N                           | 1.000       |
|               | rs4148380   | c.*1293G>A             |              | 3'UTR               | 4.9     | N                           | 0.151       |
|               | rs113328089 | c.*228G>A              |              | 3'UTR               | 2.2     | N                           | 1.000       |
|               | Novel       | c.*1293G>0             |              | 3'UTR               | 1.1     | N                           | 1.000       |
|               | Novel       | c.66del5>C             |              | frameshift deletion | 0.5     | D                           | 1.000       |



| Gene  | rs code     | NT change          | AA change    | Type      | MAF (%) | <i>In silico</i> prediction | HWE p-value |
|-------|-------------|--------------------|--------------|-----------|---------|-----------------------------|-------------|
| ABCC2 | rs45511401  | c.2012G>T          | p.Gly671Val  | missense  | 3.8     | D                           | 1.000       |
|       | rs139158420 | c.*401C>T          |              | 3'UTR     | 0.5     | N                           | 1.000       |
|       | Novel       | c.*1752_*1753insA  |              | 3'UTR     | 1.6     | N                           | 1.000       |
|       | rs111601005 | c.*1752delA        |              | 3'UTR     | 2.2     | N                           | 1.000       |
|       | rs45492303  | c.*1237G>C         |              | 3'UTR     | 2.2     | N                           | 1.000       |
|       | rs74009607  | c.*443C>T          |              | 3'UTR     | 2.2     | N                           | 1.000       |
|       | rs80085493  | c.*1604C>T         |              | 3'UTR     | 0.5     | N                           | 1.000       |
|       | Novel       | c.*1015_*1016delGC |              | 3'UTR     | 0.5     | N                           | 1.000       |
|       | rs8187856   | g.16146576C>G      |              | splicing  | 1.1     | N                           | 1.000       |
|       | rs146369277 | c.*800C>G          |              | 3'UTR     | 0.5     | N                           | 1.000       |
|       | rs183032276 | c.4154G>A          | p.Arg1385Gln | missense  | 0.5     | N                           | 1.000       |
|       | rs112282109 | c.1898G>A          | p.Arg633Gln  | missense  | 0.5     | N                           | 1.000       |
|       | rs557646879 | c.-88_-75del-      |              | 5'UTR     | 0.5     | N                           | 1.000       |
|       | rs147785655 | c.*1000G>A         |              | 3'UTR     | 0.5     | N                           | 1.000       |
|       | rs45569938  | c.*546T>G          |              | 3'UTR     | 0.5     | N                           | 1.000       |
|       | rs13337489  | c.3140G>C          | p.Cys1047Ser | missense  | 1.1     | N                           | 1.000       |
|       | rs28706727  | c.3436G>A          | p.Val1146Ile | missense  | 0.5     | N                           | 1.000       |
|       | rs143805318 | c.*1644C>T         |              | 3'UTR     | 0.5     | N                           | 1.000       |
|       | Novel       | c.145T>G           |              | missense  | 0.5     | N                           | 1.000       |
|       | rs182967563 | c.*272G>A          |              | 3'UTR     | 0.5     | N                           | 1.000       |
|       | rs187769078 | c.185G>A           | p.Arg62Gln   | missense  | 0.5     | N                           | 1.000       |
|       | rs188577026 | c.*891A>G          |              | 3'UTR     | 0.5     | N                           | 1.000       |
|       | rs199815778 | c.4441G>A          | p.Val1481Ile | missense  | 0.5     | N                           | 1.000       |
|       | rs2273697   | c.1249G>A          | p.Val417Ile  | missense  | 16.8    | N                           | 0.429       |
|       | rs45441199  | c.3107T>C          | p.Ile1036Thr | missense  | 1.1     | N                           | 1.000       |
|       | rs927344    | c.116A>T           | p.Tyr39Phe   | missense  | 98.9    | N                           | <0.001      |
|       | rs17222723  | c.3563T>A          | p.Val1188Glu | missense  | 7.6     | N                           | 0.051       |
|       | rs8187699   | c.3817A>G          | p.Thr1273Ala | missense  | 0.5     | N                           | 1.000       |
|       | rs8187710   | c.4544G>A          | p.Cys1515Tyr | missense  | 9.8     | N                           | 0.136       |
|       | rs17222617  | c.2546T>G          | p.Leu849Arg  | missense  | 1.6     | N                           | 1.000       |
|       | rs717620    | c.-24C>T           |              | 5'UTR     | 17.9    | N                           | 0.701       |
|       | rs138578110 | c.*259G>T          |              | 3'UTR     | 1.1     | N                           | 1.000       |
|       | rs8187692   | c.3542G>T          | p.Arg1181Leu | missense  | 2.7     | D                           | 1.000       |
|       | rs7080681   | c.1058G>A          | p.Arg353His  | missense  | 2.7     | N                           | 1.000       |
|       | rs17216317  | c.3872C>T          | p.Pro1291Leu | missense  | 3.3     | D                           | 1.000       |
|       | rs72558199  | c.3196C>T          | p.Arg1066X   | stop gain | 0.5     | N                           | 1.000       |
|       | rs141413284 | c.1860T>A          | p.Asp620Glu  | missense  | 0.5     | N                           | 1.000       |
| ABCC3 | rs533334893 | g.101552117G>A     |              | splicing  | 0.5     | D                           | 1.000       |
|       | rs34926034  | c.202C>T           | p.His68Tyr   | missense  | 1.1     | N                           | 1.000       |
|       | rs141856639 | c.3971G>A          | p.Arg1324His | missense  | 1.1     | D                           | 1.000       |
|       | rs35999272  | c.2758C>T          | p.Pro920Ser  | missense  | 2.2     | N                           | 1.000       |
|       | rs34346931  | c.1223A>G          | p.Glu408Gly  | missense  | 0.5     | N                           | 1.000       |
|       | rs150601692 | c.4030A>G          | p.Lys1344Glu | missense  | 0.5     | N                           | 1.000       |
|       | rs11568591  | c.3890G>A          | p.Arg1297His | missense  | 6.5     | D                           | 1.000       |
|       | rs200779271 | c.980T>C           | p.Ile327Thr  | missense  | 0.5     | N                           | 1.000       |
|       | rs201562834 | c.871C>T           | p.Arg291Trp  | missense  | 0.5     | N                           | 1.000       |
|       | rs1003354   | c.1580C>T          | p.Thr527Met  | missense  | 0.5     | N                           | 1.000       |

| Gene   | rs code      | NT change          | AA change    | Type     | MAF (%) | <i>In silico</i> prediction | HWE p-value |
|--------|--------------|--------------------|--------------|----------|---------|-----------------------------|-------------|
| ABCG2  | rs143608762  | c.694C>T           | p.Arg232Trp  | missense | 0.5     | N                           | 1.000       |
|        | rs35777968   | c.296G>A           | p.Arg99Gln   | missense | 0.5     | N                           | 1.000       |
|        | rs139106724  | c.2377G>A          | p.Val793Ile  | missense | 1.1     | N                           | 1.000       |
|        | rs200413276  | c.2558C>A          | p.Ala853Asp  | missense | 0.5     | N                           | 1.000       |
|        | rs372683132  | c.922G>A           | p.Gly308Ser  | missense | 1.1     | N                           | 1.000       |
|        | rs11568584   | c.2153A>T          | p.Lys718Met  | missense | 0.5     | N                           | 1.000       |
|        | rs11568607   | g.48745787G>A      |              | splicing | 2.2     | N                           | 1.000       |
|        | rs11568590   | c.4094A>G          | p.Gln1365Arg | missense | 0.5     | N                           | 1.000       |
|        | rs11568608   | c.1820G>A          | p.Ser607Asn  | missense | 1.1     | N                           | 1.000       |
|        | rs34291385   | c.2293G>C          | p.Val765Leu  | missense | 1.1     | N                           | 1.000       |
|        | rs200903266  | c.3401G>A          | p.Arg1134Gln | missense | 0.5     | N                           | 1.000       |
|        | rs138342952  | c.*258G>C          |              | 3'UTR    | 1.1     | N                           | 1.000       |
|        | rs11568588   | c.4042C>T          | p.Arg1348Cys | missense | 1.1     | N                           | 1.000       |
|        | rs148804178  | c.205C>G           | p.Leu69Val   | missense | 0.5     | N                           | 1.000       |
|        | rs563802547  | c.*140_*141insT    |              | 3'UTR    | 0.5     | N                           | 1.000       |
|        | rs45605536   | c.1582G>A          | p.Ala528Thr  | missense | 1.1     | N                           | 1.000       |
|        | rs111766106  | c.-18485C>T        |              | 5'UTR    | 0.5     | N                           | 1.000       |
|        | rs45510401   | c.*1964T>C         |              | 3'UTR    | 2.2     | N                           | 0.026       |
|        | rs72554040   | c.-91177C>T        |              | 5'UTR    | 8.2     | N                           | 0.389       |
|        | rs1448784    | c.*1066T>C         |              | 3'UTR    | 1.1     | N                           | 1.000       |
|        | rs2231142    | c.421C>A           | p.Gln141Lys  | missense | 6.5     | N                           | 1.000       |
|        | rs2231137    | c.34G>A            | p.Val12Met   | missense | 6.0     | N                           | 1.000       |
|        | rs10030206   | c.*1295A>T         |              | 3'UTR    | 1.1     | N                           | 1.000       |
|        | rs115770495  | c.*1726G>A         |              | 3'UTR    | 2.2     | N                           | 1.000       |
|        | rs1337337886 | c.131A>G           | p.Tyr44Cys   | missense | 0.5     | N                           | 1.000       |
|        | rs35965584   | c.1624A>G          | p.Thr542Ala  | missense | 0.5     | N                           | 1.000       |
|        | rs45630471   | c.-18400A>G        |              | 5'UTR    | 0.5     | N                           | 1.000       |
|        | rs2231135    | c.-18847T>C        |              | 5'UTR    | 1.1     | N                           | 1.000       |
|        | Novel        | c.1453C>A          |              | missense | 0.5     | N                           | 1.000       |
|        | rs138606116  | c.1060G>A          | p.Gly354Arg  | missense | 0.5     | N                           | 1.000       |
|        | rs55927234   | c.-18436C>G        |              | 5'UTR    | 0.5     | N                           | 1.000       |
|        | rs34783571   | c.1858G>A          | p.Asp620Asn  | missense | 0.5     | N                           | 1.000       |
|        | rs34264773   | c.1758A>T          | p.Lys586Asn  | missense | 0.5     | N                           | 1.000       |
|        | Novel        | c.*1575T>C         |              | 3'UTR    | 0.5     | N                           | 1.000       |
| CYP1A2 | rs34124189   | g.89053790G>A      |              | splicing | 0.5     | N                           | 1.000       |
|        | rs33923017   | c.*360_*361insT    |              | 3'UTR    | 11.4    | N                           | 0.595       |
|        | rs34002060   | c.*1034delT        |              | 3'UTR    | 15.2    | N                           | 0.213       |
|        | rs58661304   | c.*270A>C          |              | 3'UTR    | 5.4     | N                           | 0.012       |
|        | Novel        | c.*1033_*1034insT  |              | 3'UTR    | 6.0     | N                           | 1.000       |
|        | rs1288558234 | g.75041241del      |              | splicing | 0.5     | N                           | 1.000       |
|        | rs17861157   | c.894C>A           | p.Ser298Arg  | missense | 3.3     | N                           | 0.065       |
|        | rs45540640   | c.613T>G           | p.Phe205Val  | missense | 0.5     | N                           | 1.000       |
|        | rs913188841  | g.75041242C>G      |              | splicing | 0.5     | N                           | 1.000       |
|        | rs201763966  | c.142T>G           | p.Trp48Gly   | missense | 0.5     | N                           | 1.000       |
|        | Novel        | c.*1035_*1036insT  |              | 3'UTR    | 18.5    | N                           | 0.127       |
|        | Novel        | c.*1035delT        |              | 3'UTR    | 18.5    | N                           | 0.127       |
|        | Novel        | c.*1034_*1035delTT |              | 3'UTR    | 19.6    | N                           | 0.070       |

| Gene    | rs code     | NT change          | AA change   | Type     | MAF (%) | <i>In silico</i> prediction | HWE p-value |
|---------|-------------|--------------------|-------------|----------|---------|-----------------------------|-------------|
| CYP2C19 | Novel       | c.*361_*362insT    |             | 3'UTR    | 12.5    | N                           | 0.600       |
|         | Novel       | c.*361_*362insTT   |             | 3'UTR    | 12.5    | N                           | 0.600       |
|         | rs201977879 | c.*361delT         |             | 3'UTR    | 17.9    | N                           | 0.211       |
|         | Novel       | c.*274C>0          |             | 3'UTR    | 1.1     | N                           | 1.000       |
|         | rs11636419  | c.*171A>G          |             | 3'UTR    | 6.5     | N                           | 1.000       |
|         | rs150722579 | c.*292_*293insC    |             | 3'UTR    | 1.6     | N                           | 1.000       |
|         | rs17861162  | c.*1324C>G         |             | 3'UTR    | 8.7     | N                           | 1.000       |
|         | rs201077484 | c.*274delC         |             | 3'UTR    | 1.6     | N                           | 1.000       |
|         | rs57295890  | c.*282delC         |             | 3'UTR    | 10.3    | N                           | 1.000       |
|         | rs200442208 | c.*282C>A          |             | 3'UTR    | 2.2     | N                           | 1.000       |
|         | rs780737808 | c.*304_*305insAT   |             | 3'UTR    | 1.6     | N                           | 1.000       |
|         | Novel       | c.*1034_*1035insT  |             | 3'UTR    | 1.1%    | N                           | 1.000       |
|         | rs201443593 | c.*292A>C          |             | 3'UTR    | 0.5     | N                           | 1.000       |
|         | rs56141902  | c.*854G>A          |             | 3'UTR    | 0.5     | N                           | 1.000       |
|         | Novel       | c.*271_*274delAAAC |             | 3'UTR    | 2.7     | N                           | 0.044       |
|         | rs758124536 | c.409C>T           | p.Arg137Trp | missense | 0.5     | N                           | 1.000       |
|         | Novel       | c.*283_*284insA    |             | 3'UTR    | 1.1     | N                           | 1.000       |
|         | Novel       | c.*282_*283delins0 |             | 3'UTR    | 1.1%    | N                           | 1.000       |
|         | Novel       | c.*283delA         |             | 3'UTR    | 1.1     | N                           | 1.000       |
|         | Novel       | c.*263_*264insA    |             | 3'UTR    | 0.5     | N                           | 1.000       |
|         | rs200675446 | c.*263delA         |             | 3'UTR    | 4.9     | N                           | 1.000       |
|         | rs45564134  | c.*974delG         |             | 3'UTR    | 0.5     | N                           | 1.000       |
|         | rs28465265  | c.*274C>A          |             | 3'UTR    | 0.5     | N                           | 1.000       |
|         | rs3758581   | c.991A>G           | p.Ile331Val | missense | 43.5    | N                           | <0.001      |
|         | rs17884712  | c.431G>A           | p.Arg144His | missense | 2.2     | D                           | 1.000       |
|         | rs576823729 | c.648C>G           | p.Cys216Trp | missense | 0.5     | N                           | 1.000       |
|         | rs17882687  | c.55A>C            | p.Ile19Leu  | missense | 0.5     | N                           | 1.000       |
|         | rs17878459  | c.276G>C           | p.Glu92Asp  | missense | 3.3     | N                           | 1.000       |
|         | rs58973490  | c.449G>A           | p.Arg150His | missense | 1.1     | N                           | 1.000       |
| CYP2C8  | rs1058932   | c.*24C>T           |             | 3'UTR    | 23.9    | N                           | 0.006       |
|         | rs11572078  | g.96827126dup      |             | splicing | 17.4    | N                           | <0.001      |
|         | rs2071426   | g.5932A>G          |             | splicing | 23.9    | D                           | 1.000       |
|         | rs10509681  | c.890A>G           | p.Lys297Arg | missense | 4.9     | N                           | 1.000       |
| CYP2C9  | rs77147096  | c.787G>A           | p.Gly263Ser | missense | 0.5     | N                           | 1.000       |
|         | rs369591911 | c.65G>A            | p.Arg22Gln  | missense | 0.5     | N                           | 1.000       |
|         | rs143386810 | c.844G>A           | p.Gly282Ser | missense | 0.5     | N                           | 1.000       |
|         | rs1799853   | c.430C>T           | p.Arg144Cys | missense | 8.8     | D                           | 1.000       |
|         | rs9332242   | c.*108C>G          |             | 3'UTR    | 8.8     | N                           | 1.000       |
|         | rs28371685  | c.1003C>T          | p.Arg335Trp | missense | 0.9     | N                           | 1.000       |
|         | rs1057910   | c.1075A>C          | p.Ile359Leu | missense | 7.5     | N                           | 0.475       |
|         | rs577147873 | c.*60C>T           |             | 3'UTR    | 0.4     | N                           | 1.000       |
|         | rs7900194   | c.449G>A           | p.Arg150His | missense | 1.3     | N                           | 1.000       |
|         | rs2256871   | c.752A>G           | p.His251Arg | missense | 2.2     | D                           | 1.000       |
| CYP2D6  | rs201055266 | c.1034T>C          | p.Met345Thr | missense | 0.4     | N                           | 1.000       |
|         | rs16947     | c.733C>T           | p.Arg245Cys | missense | 32.6    | N                           | 0.211       |
|         | rs769258    | c.31G>A            | p.Val11Met  | missense | 4.3     | N                           | 0.119       |
|         | rs1058172   | c.941G>A           | p.Arg314His | missense | 4.9     | D                           | 1.000       |

| Gene    | rs code     | NT change         | AA change           | Type                   | MAF (%) | <i>In silico</i> prediction | HWE p-value |
|---------|-------------|-------------------|---------------------|------------------------|---------|-----------------------------|-------------|
| CYP3A4  | rs1065852   | c.100C>T          | p.Pro34Ser          | missense               | 6.0     | D                           | 0.224       |
|         | Novel       | c.551C>T          |                     | missense               | 0.5     | N                           | 1.000       |
|         | rs5030656   | c.88_690del       | p.Lys230_C442delins | nonframeshift deletion | 1.1     | LD                          | 1.000       |
|         | rs28371717  | c.556G>T          | p.Ala186Ser         | missense               | 0.5     | N                           | 1.000       |
|         | rs28371704  | c.281A>G          | p.His94Arg          | missense               | 1.6     | N                           | 1.000       |
|         | rs3892097   |                   |                     | splicing               | 2.2     | D                           | 1.000       |
|         | rs28371706  | c.320C>T          | p.Thr107Ile         | missense               | 2.2     | N                           | 1.000       |
|         | rs139779104 | c.482G>A          | p.Gly161Glu         | missense frameshift    | 0.5     | N                           | 1.000       |
|         | rs5030655   | c.54del4>T        | p.Trp152Gfs*2       | deletion               | 0.5     | D                           | 1.000       |
|         | rs140513104 | c.821C>T          | p.Pro274Leu         | missense               | 0.5     | N                           | 1.000       |
|         | rs59421388  | c.859G>A          | p.Val287Met         | missense               | 0.5     | N                           | 1.000       |
|         | rs61736512  | c.406G>A          | p.Val136Met         | missense               | 0.5     | N                           | 1.000       |
|         | rs28371703  | c.271C>A          | p.Leu91Met          | missense               | 1.1     | D                           | 1.000       |
|         | rs28969391  | c.*767delT        |                     | 3'UTR                  | 18.0    | N                           | 0.757       |
|         | rs28988604  | c.*683C>T         |                     | 3'UTR                  | 3.5     | N                           | 1.000       |
|         | rs12721631  | c.*329C>T         |                     | 3'UTR                  | 1.3     | N                           | 1.000       |
|         | rs4986907   | c.485G>A          | p.Arg162Gln         | missense               | 0.4     | N                           | 1.000       |
|         | rs28371763  | c.*948A>T         |                     | 3'UTR                  | 1.3     | N                           | 1.000       |
|         | rs28988606  | c.*1095C>T        |                     | 3'UTR                  | 0.9     | N                           | 1.000       |
| CYP3A5  | rs15524     | c.*14T>C          |                     | 3'UTR                  | 21.1    | N                           | 0.576       |
|         | rs776746    | g.12083G>A        |                     | splicing               | 77.6    | D                           | 0.431       |
|         | rs41279857  | c.299C>A          | p.Ser100Tyr         | missense               | 0.4     | N                           | 1.000       |
|         | rs10264272  | g.19787G>A        | p.Lys208Lys         | synonym                | 3.1     | N                           | 1.000       |
|         | rs149664815 | c.1378C>T         | p.Gln460X           | stop gain              | 0.4     | D                           | 1.000       |
|         | rs28371765  | c.-3554A>C        |                     | 5'UTR                  | 0.4     | N                           | 1.000       |
|         | rs28365095  | c.-3625G>A        |                     | 5'UTR                  | 0.4     | N                           | 1.000       |
|         | rs6977165   | c.423A>G          | p.X141Trp           | stoploss               | 5.7     | D                           | 1.000       |
|         | rs145774441 | c.827T>C          | p.Ile276Thr         | missense               | 0.4     | N                           | 1.000       |
|         | rs28371764  | c.-3613C>T        |                     | 5'UTR frameshift       | 3.1     | N                           | 1.000       |
| SLC15A1 | rs200579169 | c.92dupG          | p.Gly31fs           | insertion              | 0.4     | D                           | 1.000       |
|         | rs28383468  | c.88C>T           | p.His30Tyr          | missense               | 0.4     | N                           | 1.000       |
|         | rs147489136 | c.608T>G          | p.Phe203Cys         | missense frameshift    | 0.4     | N                           | 1.000       |
|         | rs547253411 | c.1372delG        | p.Val458Sfs*16      | deletion frameshift    | 0.4     | D                           | 1.000       |
|         | rs41303343  | c.1035dupT        | p.Thr346fs          | insertion              | 1.8     | D                           | 1.000       |
|         | rs6957030   | c.419T>G          | p.Leu140Arg         | missense               | 0.4     | N                           | 1.000       |
|         | rs1289389   | c.*688G>A         |                     | 3'UTR                  | 19.0    | N                           | 0.024       |
|         | rs759932207 | c.*178_*177delTT  |                     | 3'UTR                  | 19.6    | N                           | 0.070       |
|         | rs779338904 | c.*178_*176delTTT |                     | 3'UTR                  | 2.8     | N                           | 1.000       |
|         | Novel       | c.*178_*179insT   |                     | 3'UTR                  | 1.1     | N                           | 1.000       |
|         | rs4646234   | c.*598A>G         |                     | 3'UTR                  | 12.5    | N                           | 1.000       |
|         | rs2297322   | c.350G>A          | p.Ser117Asn         | missense               | 18.5    | N                           | 0.003       |
|         | rs7331216   | c.*59A>G          |                     | 3'UTR                  | 9.8     | N                           | 0.517       |
|         | rs113824127 | c.*211G>T         |                     | 3'UTR                  | 1.1     | N                           | 1.000       |
|         | rs8187820   | c.364G>A          | p.Val122Met         | missense               | 1.6     | D                           | 1.000       |

| Gene    | rs code     | NT change             | AA change   | Type                   | MAF (%) | <i>In silico</i> prediction | HWE p-value |
|---------|-------------|-----------------------|-------------|------------------------|---------|-----------------------------|-------------|
|         | rs8187838   | c.1352C>A             | p.Thr451Asn | missense               | 1.6     | N                           | 1.000       |
|         | Novel       | c.*176_*177insT       |             | 3'UTR                  | 3.8     | N                           | 1.000       |
|         | Novel       | c.*174_*175insT       |             | 3'UTR                  | 5.4     | N                           | 1.000       |
|         | Novel       | c.*177delT            |             | 3'UTR                  | 3.8     | N                           | 1.000       |
|         | Novel       | c.*175delT            |             | 3'UTR                  | 5.4     | N                           | 1.000       |
|         | Novel       | c.*176_*175delTT      |             | 3'UTR                  | 5.4     | N                           | 1.000       |
|         | Novel       | c.*177_*175delTTT     |             | 3'UTR                  | 5.4     | N                           | 1.000       |
|         | Novel       | c.*178_*175delTTTT    |             | 3'UTR                  | 5.4     | N                           | 1.000       |
|         | rs3783002   | c.*224C>T             |             | 3'UTR                  | 7.6     | N                           | 0.346       |
|         | rs4646227   | c.1256G>C             | p.Gly419Ala | missense               | 4.3     | N                           | 1.000       |
|         | rs2274828   | c.1348G>A             | p.Val450Ile | missense               | 0.5     | N                           | 1.000       |
|         | rs572627369 | c.*160T>C             |             | 3'UTR                  | 0.5     | N                           | 1.000       |
|         | rs578247729 | c.*914C>T             |             | 3'UTR                  | 0.5     | N                           | 1.000       |
|         | rs8187827   | g.99354731T>C         |             | splicing               | 0.5     | N                           | 1.000       |
|         | rs398037820 | c.*178delT            |             | 3'UTR                  | 3.9     | N                           | 1.000       |
|         | Novel       | c.800A>T              |             | missense               | 0.5     | N                           | 1.000       |
|         | rs114218227 | c.*125G>A             |             | 3'UTR                  | 1.1     | N                           | 1.000       |
|         | rs8187821   | c.351C>A              | p.Ser117Arg | missense               | 0.5     | N                           | 1.000       |
|         | Novel       | c.*451G>A             |             | 3'UTR                  | 0.5     | N                           | 1.000       |
|         | rs79136019  | c.*587T>C             |             | 3'UTR                  | 1.6     | N                           | 1.000       |
|         | rs8187815   | c.-73T>C              |             | 5'UTR                  | 1.1     | N                           | 1.000       |
|         | rs146304164 | c.1246G>C             | p.Val416Leu | missense               | 0.5     | N                           | 1.000       |
|         | Novel       | c.*150_*144delCTTTTTC |             | 3'UTR                  | 0.5     | N                           | 1.000       |
|         | rs4646206   | c.-33C>T              |             | 5'UTR                  | 0.5     | N                           | 1.000       |
|         | Novel       | c.*178_*173delTTTTTT  |             | 3'UTR                  | 0.6     | N                           | 1.000       |
| SLC22A1 | rs628031    | c.1222A>G             | p.Met408Val | missense               | 66.8    | N                           | 0.004       |
|         | rs683369    | c.480G>C              | p.Leu160Phe | missense               | 85.9    | N                           | <0.001      |
|         | rs776304541 | c.1406G>A             | p.Arg469His | missense               | 0.5     | N                           | 1.000       |
|         | rs35854239  | c.1275_1276del        | p.Pro425fs  | splicing               | 45.7    | D                           | <0.001      |
|         | rs34205214  | c.1025G>A             | p.Arg342His | missense               | 2.2     | N                           | 1.000       |
|         | rs34447885  | c.41C>T               | p.Ser14Phe  | missense               | 2.2     | N                           | 1.000       |
|         | rs41267797  | c.1390G>A             | p.Val464Ile | missense               | 4.9     | N                           | 0.151       |
|         | rs72552763  | c.1258_1260del        | p.Met420del | nonframeshift deletion | 18.5    | D                           | 1.000       |
|         | rs35270274  | c.1463G>T             | p.Arg488Met | missense               | 1.6     | N                           | 1.000       |
|         | rs35888596  | c.113G>A              | p.Gly38Asp  | missense               | 2.2     | D                           | 1.000       |
|         | rs34059508  | c.1393G>A             | p.Gly465Arg | missense               | 1.1     | D                           | 1.000       |
|         | rs2282143   | c.1022C>T             | p.Pro341Leu | missense               | 1.1     | D                           | 1.000       |
|         | rs12208357  | c.181C>T              | p.Arg61Cys  | missense               | 3.8     | D                           | 0.090       |
|         | rs36103319  | c.659G>T              | p.Gly220Val | missense               | 0.5     | N                           | 1.000       |
|         | rs78899680  | c.1442G>T             | p.Gly481Val | missense               | 0.5     | N                           | 1.000       |
|         | rs34130495  | c.1201G>A             | p.Gly401Ser | missense               | 0.5     | N                           | 1.000       |
|         | rs774654623 | c.1396C>A             | p.Pro466Thr | missense               | 0.5     | N                           | 1.000       |
| SLC22A6 | rs4149170   | c.-127G>A             |             | 5'UTR                  | 12.0    | N                           | 0.009       |
|         | rs4149171   | c.-20A>G              |             | 5'UTR                  | 16.8    | N                           | 0.006       |
|         | rs11568627  | c.311C>T              | p.Pro104Leu | missense               | 0.5     | N                           | 1.000       |

| Gene    | rs code     | NT change         | AA change     | Type                 | MAF (%) | In silico prediction | HWE p-value |
|---------|-------------|-------------------|---------------|----------------------|---------|----------------------|-------------|
| SLC22A8 | rs150811286 | c.*46T>C          |               | 3'UTR                | 0.5     | N                    | 1.000       |
|         | rs11568626  | c.149G>A          | p.Arg50His    | missense             | 0.5     | N                    | 1.000       |
|         | rs181212822 | c.*57G>A          |               | 3'UTR                | 0.5     | N                    | 1.000       |
|         | rs145493231 | c.-857A>G         |               | 5'UTR                | 0.5     | N                    | 1.000       |
|         | Novel       | c.*353C>T         |               | 3'UTR                | 0.5     | N                    | 1.000       |
| SLCO1B1 | rs11568481  | c.560C>T          | p.Ala187Val   | missense             | 0.5     | N                    | 1.000       |
|         | rs4149179   | c.-16G>A          |               | 5'UTR                | 3.8     | N                    | 0.090       |
|         | rs45438191  | c.473T>C          | p.Val158Ala   | missense             | 0.5     | N                    | 1.000       |
|         | rs2306283   | c.388A>G          | p.Asn130Asp   | missense             | 47.4    | N                    | 0.354       |
|         | rs4149056   | c.521T>C          | p.Val174Ala   | missense             | 11.0    | D                    | 0.355       |
|         | rs4149087   | c.*439T>G         |               | 3'UTR                | 38.2    | N                    | 0.691       |
|         | rs4149088   | c.*463A>G         |               | 3'UTR                | 35.5    | N                    | 1.000       |
|         | rs11045819  | c.463C>A          | p.Pro155Thr   | missense             | 13.2    | N                    | 1.000       |
|         | rs11045891  | c.*449A>C         |               | 3'UTR                | 15.4    | N                    | 0.725       |
|         | rs11045852  | c.733A>G          | p.Ile245Val   | missense             | 0.9     | N                    | 1.000       |
|         | rs74064213  | c.1495A>G         | p.Ile499Val   | missense             | 0.9     | N                    | 1.000       |
|         | rs34671512  | c.1929A>C         | p.Leu643Phe   | missense             | 5.3     | N                    | 0.263       |
|         | rs59502379  | c.1463G>C         | p.Gly488Ala   | missense             | 1.8     | D                    | 1.000       |
|         | rs71581985  | c.*46T>G          |               | 3'UTR                | 0.9     | N                    | 1.000       |
|         | rs77271279  | g.21329832G>T     |               | splicing             | 0.9     | D                    | 1.000       |
|         | rs61760249  | c.*575G>A         |               | 3'UTR                | 0.4     | N                    | 1.000       |
|         | rs79135870  | c.664A>G          | p.Ile222Val   | missense             | 0.4     | N                    | 1.000       |
|         | rs59113707  | c.1200C>G         | p.Phe400Leu   | missense             | 0.4     | N                    | 1.000       |
|         | rs72655363  | c.*82C>T          |               | 3'UTR                | 0.4     | N                    | 1.000       |
| SLCO1B3 | rs3764009   | g.21013948C>T     |               | splicing             | 16.3    | N                    | <0.001      |
|         | rs4149117   | c.250T>G          | p.Ser84Ala    | missense             | 76.1    | N                    | <0.001      |
|         | rs4149158   | c.-7_-4del-       |               | 5'UTR                | 24.5    | N                    | 0.040       |
|         | rs527574443 | c.-28_-11del-     |               | 5'UTR                | 24.5    | N                    | 0.040       |
|         | rs7305323   | c.-2125C>T        |               | 5'UTR                | 64.1    | N                    | <0.001      |
|         | rs7311358   | c.615G>A          | p.Met205Ile   | missense             | 72.8    | N                    | <0.001      |
|         | rs397689574 | c.*347_*348insA   |               | 3'UTR                | 32.6    | N                    | 0.629       |
|         | rs57585902  | c.355A>G          | p.Thr119Ala   | missense             | 1.1     | N                    | 1.000       |
|         | rs60140950  | c.767G>C          | p.Gly228Ala   | missense             | 14.7    | D                    | 0.048       |
|         | rs780598056 | c.1333delG        | p.Val445Sfs*6 | deletion             | 0.5     | D                    | 1.000       |
|         | rs773176181 | c.1247G>C         | p.Gly416Ala   | missense             | 0.5     | N                    | 1.000       |
|         | rs150007972 | c.233C>A          | p.Thr78Asn    | missense             | 0.5     | N                    | 1.000       |
|         | rs61736817  | c.1282C>T         | p.Leu428Phe   | missense             | 0.5     | N                    | 1.000       |
|         | rs76963574  | c.1628C>G         | p.Ala543Gly   | missense             | 0.5     | N                    | 1.000       |
|         | rs115227445 | c.592C>G          | p.Leu198Val   | missense             | 0.5     | N                    | 1.000       |
|         | rs77957556  | c.*642G>A         |               | 3'UTR                | 1.1     | N                    | 1.000       |
|         | rs558592800 | c.119_120insAATTG | p.Asp42Efs*12 | frameshift insertion | 0.5     | D                    | 1.000       |
|         | Novel       | c.596G>T          |               | missense             | 0.5     | N                    | 1.000       |
|         | Novel       | c.-2107A>T        |               | 5'UTR                | 0.5     | N                    | 1.000       |
|         | rs12299012  | c.1595T>C         | p.Val532Ala   | missense             | 1.1     | N                    | 1.000       |
| SLCO2B1 | rs958332597 | g.21032366C>T     |               | splicing             | 0.5     | N                    | 1.000       |
|         | rs11236359  | c.-2866A>G        |               | 5'UTR                | 75.5    | N                    | <0.001      |

| Gene   | rs code     | NT change        | AA change    | Type                   | MAF (%) | <i>In silico</i> prediction | HWE p-value |
|--------|-------------|------------------|--------------|------------------------|---------|-----------------------------|-------------|
| UGT1A3 | rs1944612   | c.-36A>G         |              | 5'UTR                  | 98.9    | N                           | <0.001      |
|        | rs2851069   | c.-71T>C         |              | 5'UTR                  | 47.3    | N                           | 0.078       |
|        | rs17133818  | c.*1386C>T       |              | 3'UTR                  | 6.0     | N                           | 1.000       |
|        | rs1801906   | c.*1070T>C       |              | 3'UTR                  | 9.2     | N                           | 1.000       |
|        | rs2306168   | c.1025C>T        | p.Ser342Phe  | missense               | 6.5     | N                           | 0.263       |
|        | rs3781727   | c.*396T>C        |              | 3'UTR                  | 6.5     | N                           | 1.000       |
|        | rs41298121  | c.*1222T>C       |              | 3'UTR                  | 10.3    | N                           | 0.558       |
|        | rs12422149  | c.503G>A         | p.Arg168Gln  | missense               | 12.0    | N                           | 0.595       |
|        | Novel       | c.*956C>A        |              | 3'UTR                  | 0.5     | N                           | 1.000       |
|        | rs41298117  | c.*721C>G        |              | 3'UTR                  | 3.8     | N                           | 1.000       |
|        | rs78825186  | c.485G>A         | p.Arg162His  | missense               | 1.1     | N                           | 1.000       |
|        | rs145875125 | c.1206C>A        | p.Asn402Lys  | missense               | 0.5     | N                           | 1.000       |
|        | rs185838153 | c.*1776T>C       |              | 3'UTR<br>nonframeshift | 0.5     | N                           | 1.000       |
|        | rs60113013  | c._614del        | p.Glu4_T6del | deletion               | 1.6     | LD                          | 1.000       |
|        | rs35199625  | c.169G>A         | p.Val57Met   | missense               | 1.1     | N                           | 1.000       |
|        | rs6431625   | c.140T>C         | p.Val47Ala   | missense               | 41.8    | N                           | 0.212       |
|        | rs28898619  | c.342G>A         | p.Met114Ile  | missense               | 1.1     | N                           | 1.000       |
|        | rs3821242   | c.31T>C          | p.Trp11Arg   | missense               | 45.7    | N                           | 0.027       |
|        | rs61764030  | c.473C>T         | p.Ala158Val  | missense               | 1.1     | N                           | 1.000       |
|        | rs149324549 | c.775G>C         | p.Gly259Arg  | missense               | 1.1     | N                           | 1.000       |
|        | rs45449995  | c.808A>G         | p.Met270Val  | missense               | 2.2     | D                           | 0.026       |
|        | rs61764031  | c.523A>T         | p.Asn175Tyr  | missense               | 0.5     | N                           | 1.000       |
|        | rs140541315 | c.172G>A         | p.Ala58Thr   | missense               | 0.5     | N                           | 1.000       |
|        | rs13406898  | c.431C>T         | p.Thr144Ile  | missense               | 0.5     | N                           | 1.000       |
|        | rs45595237  | c.145C>T         | p.Arg49Trp   | missense               | 0.5     | N                           | 1.000       |
| UGT2B7 | rs57075995  | c.*100_*101insA  |              | 3'UTR                  | 17.9    | N                           | 0.122       |
|        | rs7439366   | c.802T>C         | p.Tyr268His  | missense               | 62.0    | N                           | <0.001      |
|        | Novel       | c.*101delA       |              | 3'UTR                  | 29.1    | N                           | <0.001      |
|        | rs111878373 | c.-2G>A          |              | 5'UTR                  | 1.1     | N                           | 1.000       |
|        | rs140153012 | c.321A>T         | p.Leu107Phe  | missense               | 1.1     | N                           | 1.000       |
|        | rs57075995  | c.*100_*101insAA |              | 3'UTR                  | 2.2     | N                           | 1.000       |
|        | Novel       | c.*101_*102insA  |              | 3'UTR                  | 22.8    | N                           | 0.012       |
|        | Novel       | c.*101_*102insAA |              | 3'UTR                  | 22.8    | N                           | 0.012       |
|        | rs60103519  | c.536C>T         | p.Thr179Ile  | missense               | 1.1     | N                           | 1.000       |
|        | rs78265585  | c.*247C>A        |              | 3'UTR                  | 1.6     | N                           | 1.000       |

*In silico* functionality prediction was performed either using the functionality prediction score (FPS) for missense variants or dbNSFP v4.2 *in silico* algorithm for splice variants. Frameshift variants were considered deleterious. Nonframeshift variants were considered potentially deleterious. AA: amino acid; NT nucleotide; D: deleterious; HWE: Hardy-Weinberg equilibrium; LD: likely deleterious; MAF: minor allele frequency; N: neutral; PK: pharmacokinetics; UTR: untranslated region.

**Table S9** FPS score of variants in PK-related genes identified in FH patients (n = 114).

| Gene          | rs code     | NT change | AA change    | Type      | MAF (%) | FPS |
|---------------|-------------|-----------|--------------|-----------|---------|-----|
| <i>ABCB1</i>  | rs2032582   | c.2677T>G | p.Ser893Ala  | missense  | 59.2    | 0.2 |
|               | rs2229107   | c.3421T>A | p.Ser1141Thr | missense  | 1.3     | 0.0 |
|               | rs9282564   | c.61A>G   | p.Asn21Asp   | missense  | 3.9     | 0.0 |
|               | rs2032582   | c.2677T>A | p.Ser893Thr  | missense  | 3.1     | 0.4 |
|               | rs2229109   | c.1199G>A | p.Ser400Asn  | missense  | 3.5     | 0.2 |
|               | rs35023033  | c.2005C>T | p.Arg669Cys  | missense  | 0.4     | 0.6 |
|               | rs35730308  | c.3322T>C | p.Trp1108Arg | missense  | 0.4     | 0.8 |
|               | rs28364274  | c.3751G>A | p.Val1251Ile | missense  | 0.9     | 0.2 |
|               | rs57521326  | c.3262G>A | p.Asp1088Asn | missense  | 0.9     | 0.6 |
|               | rs36008564  | c.781A>G  | p.Ile261Val  | missense  | 0.4     | 0.2 |
| <i>ABCB11</i> | rs2287622   | c.1331T>C | p.Val444Ala  | missense  | 58.7    | 0.0 |
|               | rs11568364  | c.2029A>G | p.Met677Val  | missense  | 5.4     | 0.2 |
|               | rs1521808   | c.3556G>A | p.Glu1186Lys | missense  | 0.5     | 0.4 |
|               | rs766285158 | c.3691C>T | p.Arg1231Trp | missense  | 0.5     | 1.0 |
|               | rs11568357  | c.616A>G  | p.Ile206Val  | missense  | 0.5     | 0.0 |
|               | rs111482608 | c.1636C>A | p.Gln546Lys  | missense  | 0.5     | 0.2 |
|               | rs11568370  | c.1774G>C | p.Glu592Gln  | missense  | 0.5     | 0.6 |
| <i>ABCC1</i>  | rs4148356   | c.2168G>A | p.Arg723Gln  | missense  | 0.5     | 0.0 |
|               | rs45511401  | c.2012G>T | p.Gly671Val  | missense  | 3.8     | 0.8 |
|               | rs183032276 | c.4154G>A | p.Arg1385Gln | missense  | 0.5     | 1.0 |
|               | rs112282109 | c.1898G>A | p.Arg633Gln  | missense  | 0.5     | 0.0 |
|               | rs13337489  | c.3140G>C | p.Cys1047Ser | missense  | 1.1     | 0.0 |
|               | rs28706727  | c.3436G>A | p.Val1146Ile | missense  | 0.5     | 0.4 |
|               | Novel       | c.145T>G  | p.Cys49Gly   | missense  | 0.5     | NR  |
|               | rs187769078 | c.185G>A  | p.Arg62Gln   | missense  | 0.5     | 0.4 |
|               | rs199815778 | c.4441G>A | p.Val1481Ile | missense  | 0.5     | 0.4 |
| <i>ABCC2</i>  | rs2273697   | c.1249G>A | p.Val417Ile  | missense  | 16.8    | 0.0 |
|               | rs45441199  | c.3107T>C | p.Ile1036Thr | missense  | 1.1     | 0.2 |
|               | rs927344    | c.116A>T  | p.Tyr39Phe   | missense  | 98.9    | 0.2 |
|               | rs17222723  | c.3563T>A | p.Val1188Glu | missense  | 7.6     | 0.2 |
|               | rs8187699   | c.3817A>G | p.Thr1273Ala | missense  | 0.5     | 0.2 |
|               | rs8187710   | c.4544G>A | p.Cys1515Tyr | missense  | 9.8     | 0.2 |
|               | rs17222617  | c.2546T>G | p.Leu849Arg  | missense  | 1.6     | 0.4 |
|               | rs8187692   | c.3542G>T | p.Arg1181Leu | missense  | 2.7     | 0.8 |
|               | rs7080681   | c.1058G>A | p.Arg353His  | missense  | 2.7     | 0.0 |
|               | rs17216317  | c.3872C>T | p.Pro1291Leu | missense  | 3.3     | 0.8 |
|               | rs72558199  | c.3196C>T | p.Arg1066X   | stop gain | 0.5     | 0.5 |
|               | rs141413284 | c.1860T>A | p.Asp620Glu  | missense  | 0.5     | 0.2 |
| <i>ABCC3</i>  | rs34926034  | c.202C>T  | p.His68Tyr   | missense  | 1.1     | 0.0 |
|               | rs141856639 | c.3971G>A | p.Arg1324His | missense  | 1.1     | 1.0 |
|               | rs35999272  | c.2758C>T | p.Pro920Ser  | missense  | 2.2     | 0.0 |
|               | rs34346931  | c.1223A>G | p.Glu408Gly  | missense  | 0.5     | 1.0 |
|               | rs150601692 | c.4030A>G | p.Lys1344Glu | missense  | 0.5     | 0.0 |
|               | rs11568591  | c.3890G>A | p.Arg1297His | missense  | 6.5     | 0.8 |
|               | rs200779271 | c.980T>C  | p.Ile327Thr  | missense  | 0.5     | 0.0 |
|               | rs201562834 | c.871C>T  | p.Arg291Trp  | missense  | 0.5     | 0.2 |
|               | rs1003354   | c.1580C>T | p.Thr527Met  | missense  | 0.5     | 0.4 |
|               | rs143608762 | c.694C>T  | p.Arg232Trp  | missense  | 0.5     | 0.8 |
|               | rs35777968  | c.296G>A  | p.Arg99Gln   | missense  | 0.5     | 0.0 |
|               | rs139106724 | c.2377G>A | p.Val793Ile  | missense  | 1.1     | 0.4 |
|               | rs200413276 | c.2558C>A | p.Ala853Asp  | missense  | 0.5     | 0.6 |
|               | rs372683132 | c.922G>A  | p.Gly308Ser  | missense  | 1.1     | 0.4 |
|               | rs11568584  | c.2153A>T | p.Lys718Met  | missense  | 0.5     | 0.4 |
|               | rs11568590  | c.4094A>G | p.Gln1365Arg | missense  | 0.5     | 0.0 |
|               | rs11568608  | c.1820G>A | p.Ser607Asn  | missense  | 1.1     | 0.0 |
|               | rs34291385  | c.2293G>C | p.Val765Leu  | missense  | 1.1     | 0.4 |
|               | rs200903266 | c.3401G>A | p.Arg1134Gln | missense  | 0.5     | 1.0 |
|               | rs11568588  | c.4042C>T | p.Arg1348Cys | missense  | 1.1     | 0.2 |



| Gene    | rs code      | NT change | AA change   | Type      | MAF (%) | FPS |
|---------|--------------|-----------|-------------|-----------|---------|-----|
| ABCG2   | rs148804178  | c.205C>G  | p.Leu69Val  | missense  | 0.5     | 0.6 |
|         | rs45605536   | c.1582G>A | p.Ala528Thr | missense  | 1.1     | 0.4 |
|         | rs2231142    | c.421C>A  | p.Gln141Lys | missense  | 6.5     | 0.2 |
|         | rs2231137    | c.34G>A   | p.Val12Met  | missense  | 6       | 0.2 |
|         | rs1337337886 | c.131A>G  | p.Tyr44Cys  | missense  | 0.5     | 0.8 |
|         | rs35965584   | c.1624A>G | p.Thr542Ala | missense  | 0.5     | 0.4 |
|         | Novel        | c.1453C>A | p.Pro485Thr | missense  | 0.5     | NR  |
|         | rs138606116  | c.1060G>A | p.Gly354Arg | missense  | 0.5     | 0.0 |
|         | rs34783571   | c.1858G>A | p.Asp620Asn | missense  | 0.5     | 0.4 |
|         | rs34264773   | c.1758A>T | p.Lys586Asn | missense  | 0.5     | 0.3 |
| CYP1A2  | rs17861157   | c.894C>A  | p.Ser298Arg | missense  | 3.3     | 0.2 |
|         | rs45540640   | c.613T>G  | p.Phe205Val | missense  | 0.5     | 1.0 |
|         | rs201763966  | c.142T>G  | p.Trp48Gly  | missense  | 0.5     | 0.8 |
|         | rs758124536  | c.409C>T  | p.Arg137Trp | missense  | 0.5     | 1.0 |
| CYP2C19 | rs3758581    | c.991G>G  | p.Val331Val | missense  | 43.5    | NR  |
|         | rs17884712   | c.431G>A  | p.Arg144His | missense  | 2.2     | 0.8 |
|         | rs576823729  | c.648C>G  | p.Cys216Trp | missense  | 0.5     | 0.6 |
|         | rs17882687   | c.55A>C   | p.Ile19Leu  | missense  | 0.5     | 0.0 |
|         | rs17878459   | c.276G>C  | p.Glu92Asp  | missense  | 3.3     | 0.2 |
| CYP2C8  | rs58973490   | c.449G>A  | p.Arg150His | missense  | 1.1     | 0.0 |
|         | rs11572103   | c.499A>T  | p.Ile167Phe | missense  | 3.3     | 0.4 |
|         | rs10509681   | c.890A>G  | p.Lys297Arg | missense  | 4.9     | 0.2 |
|         | rs11572080   | c.110G>A  | p.Arg37Lys  | missense  | 5.4     | 0.4 |
|         | rs77147096   | c.787G>A  | p.Gly263Ser | missense  | 0.5     | 0.0 |
|         | rs1058930    | c.486C>G  | p.Ile162Met | missense  | 4.9     | 0.6 |
|         | rs369591911  | c.65G>A   | p.Arg22Gln  | missense  | 0.5     | 1.0 |
|         | rs143386810  | c.844G>A  | p.Gly282Ser | missense  | 0.5     | 0.8 |
|         | rs1799853    | c.430C>T  | p.Arg144Cys | missense  | 8.8     | 1.0 |
|         | rs28371685   | c.1003C>T | p.Arg335Trp | missense  | 0.9     | 0.6 |
| CYP2C9  | rs1057910    | c.1075A>C | p.Ile359Leu | missense  | 7.5     | 0.2 |
|         | rs7900194    | c.449G>A  | p.Arg150His | missense  | 1.3     | 0.0 |
|         | rs2256871    | c.752A>G  | p.His251Arg | missense  | 2.2     | 0.8 |
|         | rs201055266  | c.1034T>C | p.Met345Thr | missense  | 0.4     | 1.0 |
|         | rs28371686   | c.1080C>G | p.Asp360Glu | missense  | 0.4     | 0.8 |
|         | rs9332239    | c.1465C>T | p.Pro489Ser | missense  | 0.4     | 0.8 |
|         | rs16947      | c.733T>T  | p.Cys245Cys | missense  | 32.6    | NR  |
|         | rs769258     | c.31G>A   | p.Val11Met  | missense  | 4.3     | 0.0 |
|         | rs1058172    | c.941G>A  | p.Arg314His | missense  | 4.9     | 1.0 |
|         | rs1065852    | c.100C>T  | p.Pro34Ser  | missense  | 6       | 1.0 |
| CYP2D6  | Novel        | c.551C>T  | p.Ala184Val | missense  | 0.5     |     |
|         | rs28371717   | c.556G>T  | p.Ala186Ser | missense  | 0.5     | 0.0 |
|         | rs28371704   | c.281A>G  | p.His94Arg  | missense  | 1.6     | 0.0 |
|         | rs28371706   | c.320C>T  | p.Thr107Ile | missense  | 2.2     | 0.0 |
|         | rs139779104  | c.482G>A  | p.Gly161Glu | missense  | 0.5     | 0.6 |
|         | rs140513104  | c.821C>T  | p.Pro274Leu | missense  | 0.5     | 1.0 |
|         | rs59421388   | c.859G>A  | p.Val287Met | missense  | 0.5     | 0.4 |
|         | rs61736512   | c.406G>A  | p.Val136Ile | missense  | 0.5     | 0.0 |
|         | rs28371703   | c.271C>A  | p.Leu91Met  | missense  | 1.1     | 0.6 |
|         | rs4986907    | c.485G>A  | p.Arg162Gln | missense  | 0.4     | 0.0 |
| CYP3A4  | rs41279857   | c.299C>A  | p.Ser100Tyr | missense  | 0.4     | 0.8 |
| CYP3A5  | rs149664815  | c.1378C>T | p.Gln460X   | stop gain | 0.4     | 1.0 |
|         | rs6977165    | c.423A>G  | p.X141Trp   | stoploss  | 5.7     | 1.0 |
|         | rs145774441  | c.827T>C  | p.Ile276Thr | missense  | 0.4     | 0.6 |
|         | rs28383468   | c.88C>T   | p.His30Tyr  | missense  | 0.4     | 0.0 |
|         | rs147489136  | c.608T>G  | p.Phe203Cys | missense  | 0.4     | 1.0 |
|         | rs6957030    | c.419T>G  | p.Leu140Arg | missense  | 0.4     | 0.0 |
|         | rs2297322    | c.350G>A  | p.Ser117Asn | missense  | 18.5    | 0.0 |
|         | rs8187820    | c.364G>A  | p.Val122Met | missense  | 1.6     | 0.6 |
|         | rs8187838    | c.1352C>A | p.Thr451Asn | missense  | 1.6     | 0.0 |
| SLC15A1 |              |           |             |           |         |     |

| Gene           | rs code     | NT change | AA change   | Type     | MAF (%) | FPS |
|----------------|-------------|-----------|-------------|----------|---------|-----|
| <i>SLC22A1</i> | rs4646227   | c.1256G>C | p.Gly419Ala | missense | 4.3     | 0.0 |
|                | rs2274828   | c.1348G>A | p.Val450Ile | missense | 0.5     | 0.0 |
|                | Novel       | c.800A>T  | p.Glu267Val | missense | 0.5     | NR  |
|                | rs8187821   | c.351C>A  | p.Ser117Arg | missense | 0.5     | 0.0 |
|                | rs146304164 | c.1246G>C | p.Val416Leu | missense | 0.5     | 0.0 |
|                | rs628031    | c.1222A>G | p.Met408Val | missense | 66.8    | 0.0 |
|                | rs683369    | c.480G>C  | p.Leu160Phe | missense | 85.9    | 0.0 |
|                | rs776304541 | c.1406G>A | p.Arg469His | missense | 0.5     | 0.5 |
|                | rs34205214  | c.1025G>A | p.Arg342His | missense | 2.2     | 0.0 |
|                | rs34447885  | c.41C>T   | p.Ser14Phe  | missense | 2.2     | 0.2 |
|                | rs41267797  | c.1390G>A | p.Val464Ile | missense | 4.9     | 0.0 |
|                | rs35270274  | c.1463G>T | p.Arg488Met | missense | 1.6     | 0.0 |
|                | rs35888596  | c.113G>A  | p.Gly38Asp  | missense | 2.2     | 1.0 |
|                | rs34059508  | c.1393G>A | p.Gly465Arg | missense | 1.1     | 0.8 |
|                | rs2282143   | c.1022C>T | p.Pro341Leu | missense | 1.1     | 0.8 |
|                | rs12208357  | c.181C>T  | p.Arg61Cys  | missense | 3.8     | 0.6 |
|                | rs36103319  | c.659G>T  | p.Gly220Val | missense | 0.5     | 0.8 |
|                | rs78899680  | c.1442G>T | p.Gly481Val | missense | 0.5     | 0.3 |
|                | rs34130495  | c.1201G>A | p.Gly401Ser | missense | 0.5     | 0.8 |
|                | rs774654623 | c.1396C>A | p.Pro466Thr | missense | 0.5     | 0.0 |
| <i>SLC22A6</i> | rs11568627  | c.311C>T  | p.Pro104Leu | missense | 0.5     | 0.6 |
|                | rs11568626  | c.149G>A  | p.Arg50His  | missense | 0.5     | 0.6 |
| <i>SLC22A8</i> | rs11568481  | c.560C>T  | p.Ala187Val | missense | 0.5     | 0.0 |
|                | rs45438191  | c.473T>C  | p.Val158Ala | missense | 0.5     | 0.0 |
| <i>SLCO1B1</i> | rs2306283   | c.388A>G  | p.Asn130Asp | missense | 47.4    | 0.0 |
|                | rs4149056   | c.521T>C  | p.Val174Ala | missense | 11      | 0.8 |
|                | rs11045819  | c.463C>A  | p.Pro155Thr | missense | 13.2    | 0.2 |
|                | rs11045852  | c.733A>G  | p.Ile245Val | missense | 0.9     | 0.2 |
|                | rs74064213  | c.1495A>G | p.Ile499Val | missense | 0.9     | 0.0 |
|                | rs34671512  | c.1929A>C | p.Leu643Phe | missense | 5.3     | 0.0 |
|                | rs59502379  | c.1463G>C | p.Gly488Ala | missense | 1.8     | 0.8 |
|                | rs79135870  | c.664A>G  | p.Ile222Val | missense | 0.4     | 0.0 |
| <i>SLCO1B3</i> | rs59113707  | c.1200C>G | p.Phe400Leu | missense | 0.4     | 0.0 |
|                | rs4149117   | c.250T>G  | p.Ser84Ala  | missense | 76.1    | 0.2 |
|                | rs7311358   | c.615G>A  | p.Met205Ile | missense | 72.8    | 0.0 |
|                | rs57585902  | c.355A>G  | p.Thr119Ala | missense | 1.1     | 0.0 |
|                | rs60140950  | c.767G>C  | p.Gly228Ala | missense | 14.7    | 1.0 |
|                | rs773176181 | c.1247G>C | p.Gly416Ala | missense | 0.5     | 0.8 |
|                | rs150007972 | c.233C>A  | p.Thr78Asn  | missense | 0.5     | 0.4 |
|                | rs61736817  | c.1282C>T | p.Leu428Phe | missense | 0.5     | 0.0 |
|                | rs76963574  | c.1628C>G | p.Ala543Gly | missense | 0.5     | 0.8 |
|                | rs115227445 | c.592C>G  | p.Leu198Val | missense | 0.5     | 0.0 |
|                | Novel       | c.596G>T  | p.Gly199Val | missense | 0.5     | NR  |
| <i>SLCO2B1</i> | rs12299012  | c.1595T>C | p.Val532Ala | missense | 1.1     | 0.0 |
|                | rs2306168   | c.1025C>T | p.Ser342Phe | missense | 6.5     | 0.0 |
|                | rs12422149  | c.503G>A  | p.Arg168Gln | missense | 12      | 0.2 |
|                | rs78825186  | c.485G>A  | p.Arg162His | missense | 1.1     | 0.0 |
|                | rs145875125 | c.1206C>A | p.Asn402Lys | missense | 0.5     | 0.0 |
|                | rs35199625  | c.169G>A  | p.Val57Met  | missense | 1.1     | 0.4 |
| <i>UGT1A3</i>  | rs6431625   | c.140T>C  | p.Val47Ala  | missense | 41.8    | 0.0 |
|                | rs28898619  | c.342G>A  | p.Met114Ile | missense | 1.1     | 0.0 |
|                | rs3821242   | c.31T>C   | p.Trp11Arg  | missense | 45.7    | 0.0 |
|                | rs61764030  | c.473C>T  | p.Ala158Val | missense | 1.1     | 0.3 |
|                | rs149324549 | c.775G>C  | p.Gly259Arg | missense | 1.1     | 0.3 |
|                | rs45449995  | c.808A>G  | p.Met270Val | missense | 2.2     | 0.8 |
|                | rs61764031  | c.523A>T  | p.Asn175Tyr | missense | 0.5     | 0.0 |
|                | rs140541315 | c.172G>A  | p.Ala58Thr  | missense | 0.5     | 0.0 |
|                | rs13406898  | c.431C>T  | p.Thr144Ile | missense | 0.5     | 0.3 |
|                | rs45595237  | c.145C>T  | p.Arg49Trp  | missense | 0.5     | 0.5 |

| Gene          | rs code     | NT change | AA change   | Type     | MAF (%) | FPS |
|---------------|-------------|-----------|-------------|----------|---------|-----|
| <i>UGT2B7</i> | rs7439366   | c.802T>C  | p.Tyr268His | missense | 62      | 0.3 |
|               | rs140153012 | c.321A>T  | p.Leu107Phe | missense | 1.1     | 0.0 |
|               | rs60103519  | c.536C>T  | p.Thr179Ile | missense | 1.1     | 0.0 |

AA: amino acid; NT nucleotide; NR: not reported (for variants that did not show any prediction in the 5 algorithms used); FPS: functionality prediction score; MAF: minor allele frequency; PK: pharmacokinetics.

**Table S10** Influence of deleterious variants in PK-related genes on LDL-c reduction in FH patients on statin treatment.

| Gene         | rs code    | NT change     | Type                       | LDL-c reduction (%) |                                 | Adjusted |         | Prediction |
|--------------|------------|---------------|----------------------------|---------------------|---------------------------------|----------|---------|------------|
|              |            |               |                            | Non carriers        | Carriers                        | p-value  | p-value |            |
| All statins  |            |               |                            |                     |                                 |          |         |            |
| ABCC1        | rs45511401 | c.2012G>T     | missense                   | -45.9 ± 20.1 (85)   | -64.7 ± 6.4 (7)                 | <0.0001  | 0.001   | 0.8        |
| ABCC2        | rs17216317 | c.3872C>T     | missense                   | -48.3 ± 18.9 (86)   | -33.6 ± 30.7 (6)                | 0.297    | 1.000   | 0.8        |
|              | rs8187692  | c.3542G>T     | missense                   | -47.5 ± 19.9 (87)   | -43 ± 23.5 (5)                  | 0.693    | 0.912   | 0.8        |
| ABCC3        | rs11568591 | c.3890G>A     | missense                   | -47 ± 20.3 (80)     | -49.5 ± 18.2 (12)               | 0.665    | 0.950   | 0.8        |
| CYP2C19      | rs17884712 | c.431G>A      | missense                   | -47.9 ± 19.8 (88)   | -33.5 ± 22.2 (4)                | 0.286    | 1.000   | 0.8        |
| CYP2C8       | rs1058930  | c.486C>G      | missense                   | -47.7 ± 20.2 (84)   | -43.4 ± 18.1 (8)                | 0.548    | 1.000   | 0.6        |
|              | rs2071426  | g.96828323T>C | splicing                   | -47.7 ± 19.2 (52)   | -46.7 ± 21.3 (40)               | 0.816    | 0.906   | D          |
| CYP2C9       | rs1799853  | c.430C>T      | missense                   | -48.8 ± 19.3 (95)   | -43.6 ± 19.6 (19)               | 0.298    | 1.000   | 1.0        |
|              | rs2256871  | c.752A>G      | missense                   | -47.7 ± 19.4 (109)  | -53.4 ± 19.5 (5)                | 0.558    | 0.962   | 0.8        |
| CYP2D6       | rs3892097  | g.42524947C>T | splicing                   | -47.8 ± 19.9 (88)   | -36.5 ± 22.3 (4)                | 0.387    | 1.000   | D          |
|              | rs1058172  | c.941G>A      | missense                   | -46.9 ± 19.8 (83)   | -51.1 ± 22.9 (9)                | 0.608    | 1.000   | 1.0        |
|              | rs1065852  | c.100C>T      | missense                   | -47.2 ± 19.9 (82)   | -48.3 ± 22 (10)<br>-47.4 ± 19.4 | 0.875    | 0.931   | 1.0        |
| CYP3A5       | rs776746   | g.99270539C>T | splicing<br>frameshift     | -57.5 ± 16.7 (7)    | (107)                           | 0.168    | 1.000   | D          |
|              | rs41303343 | c.035dup      | insertion                  | -47.8 ± 19.5 (110)  | -51.9 ± 15 (4)                  | 0.634    | 0.990   | D          |
|              | rs6977165  | c.423A>G      | stoploss                   | -47.8 ± 19.5 (101)  | -49.1 ± 18.7 (13)               | 0.823    | 0.901   | 1.0        |
| SLC15A1      | rs8187820  | c.364G>A      | missense                   | -47.3 ± 20.2 (89)   | -47.1 ± 13.7 (3)                | 0.983    | 1.000   | 0.6        |
| SLC22A1      | rs35888596 | c.113G>A      | missense<br>non-frameshift | -46.8 ± 20.1 (88)   | -59.2 ± 12.9 (4)                | 0.147    | 1.000   | 1.0        |
|              | rs72552763 | c.258_1260del | deletion                   | -48.4 ± 20.2 (60)   | -45.3 ± 19.8 (32)               | 0.484    | 1.000   | D          |
|              | rs12208357 | c.181C>T      | missense                   | -47.5 ± 19.9 (86)   | -44.5 ± 23 (6)                  | 0.768    | 0.937   | 0.6        |
| SLCO1B1      | rs4149056  | c.521T>C      | missense                   | -47.5 ± 19.6 (89)   | -49.6 ± 18.7 (25)               | 0.633    | 1.000   | 0.8        |
|              | rs59502379 | c.1463G>C     | missense                   | -48.1 ± 19.4 (110)  | -45.4 ± 20.3 (4)                | 0.808    | 0.940   | 0.8        |
| SLCO1B3      | rs60140950 | c.683G767G>C  | missense                   | -46.3 ± 19.3 (69)   | -50.4 ± 22.2 (23)               | 0.432    | 1.000   | 1.0        |
| UGT1A3       | rs45449995 | c.808A>G      | missense                   | -47.2 ± 20.2 (89)   | -50.1 ± 13.5 (3)                | 0.753    | 0.942   | 0.8        |
| Atorvastatin |            |               |                            |                     |                                 |          |         |            |
| ABCC1        | rs45511401 | c.2012G>T     | missense                   | -46.3 ± 18.4 (72)   | -65.8 ± 6.2 (6)                 | 0.000    | 0.001   | 0.8        |
| ABCC2        | rs8187692  | c.3542G>T     | missense                   | -48.4 ± 18.1 (73)   | -39.6 ± 24.1 (5)                | 0.467    | 1.000   | 0.8        |
|              | rs17216317 | c.3872C>T     | missense                   | -48.2 ± 18.3 (73)   | -42.7 ± 23.4 (5)                | 0.637    | 0.965   | 0.8        |
| ABCC3        | rs11568591 | c.3890G>A     | missense                   | -47.8 ± 18.3 (69)   | -47.9 ± 21.3 (9)                | 0.988    | 0.988   | 0.8        |
| CYP2C19      | rs17884712 | c.431G>A      | missense                   | -48.6 ± 18.1 (74)   | -33.5 ± 22.2 (4)                | 0.269    | 1.000   | 0.8        |
| CYP2C8       | rs2071426  | g.96828323T>C | splicing                   | -46.5 ± 17 (43)     | -49.4 ± 20.4 (35)               | 0.512    | 1.000   | D          |
|              | rs1058930  | c.486C>G      | missense                   | -48.1 ± 18.6 (71)   | -44.7 ± 19.2 (7)                | 0.665    | 0.924   | 0.6        |
| CYP2C9       | rs1799853  | c.430C>T      | missense                   | -48.9 ± 17.8 (81)   | -42.8 ± 20.5 (17)               | 0.264    | 1.000   | 1.0        |
|              | rs1799853  | c.430C>T      | missense                   | -48.9 ± 17.8 (81)   | -42.8 ± 20.5 (17)               | 0.264    | 1.000   | 1.0        |
|              | rs2256871  | c.752A>G      | missense                   | -47.6 ± 18.3 (93)   | -53.4 ± 19.5 (5)                | 0.547    | 1.000   | 0.8        |
| CYP2D6       | rs3892097  | g.42524947C>T | splicing                   | -48.4 ± 18.3 (74)   | -36.5 ± 22.3 (4)                | 0.364    | 1.000   | D          |
|              | rs1065852  | c.100C>T      | missense                   | -48.4 ± 18.7 (69)   | -43.6 ± 17.1 (9)                | 0.452    | 1.000   | 1.0        |
|              | rs1058172  | c.941G>A      | missense                   | -48.2 ± 18.6 (71)   | -43.7 ± 18.5 (7)                | 0.553    | 0.988   | 1.0        |

| Gene    | rs code    | NT change       | Type                      | LDL-c reduction (%) |                   | p-value | Adjusted p-value | Prediction |
|---------|------------|-----------------|---------------------------|---------------------|-------------------|---------|------------------|------------|
|         |            |                 |                           | Non carriers        | Carriers          |         |                  |            |
| CYP3A5  | rs776746   | NA              | splicing<br>frameshift    | -57.5 ± 16.7 (7)    | -47.1 ± 18.3 (91) | 0.160   | 1.000            | D          |
|         | rs41303343 | c.035dup        | insertion                 | -47.7 ± 18.3 (95)   | -52 ± 20.4 (3)    | 0.751   | 0.963            | D          |
| SLC22A1 | rs35888596 | c.113G>A        | missense                  | -47.2 ± 18.6 (74)   | -59.2 ± 12.9 (4)  | 0.158   | 1.000            | 1.0        |
|         | rs12208357 | c.181C>T        | missense                  | -47.2 ± 18.5 (75)   | -62.3 ± 15.4 (3)  | 0.228   | 1.000            | 0.6        |
|         | rs72552763 | c.258_1260del>I | deletion<br>nonframeshift | -48.5 ± 19.2 (51)   | -46.5 ± 17.4 (27) | 0.649   | 0.954            | D          |
|         | rs72552763 | c.258_1260del>I | deletion                  | -48.5 ± 19.2 (51)   | -46.5 ± 17.4 (27) | 0.649   | 0.954            | D          |
| SLCO1B1 | rs4149056  | c.521T>C        | missense                  | -47.2 ± 18.5 (78)   | -50.3 ± 17.7 (20) | 0.502   | 1.000            | 0.8        |
|         | rs59502379 | c.1463G>C       | missense                  | -48 ± 18.3 (94)     | -45.4 ± 20.3 (4)  | 0.815   | 0.927            | 0.8        |
| SLCO1B3 | rs60140950 | c.683G767G>C    | missense                  | -47 ± 17.7 (63)     | -51.4 ± 21.8 (15) | 0.473   | 1.000            | 1.0        |
| ABCC3   | rs11568591 | c.3890G>A       | missense                  | -35.8 ± 16.7 (22)   | -33.5 ± 23.6 (3)  | 0.884   | 0.921            | 0.8        |
| CYP2C8  | rs2071426  | g.96828323T>C   | splicing                  | -36.3 ± 15.2 (15)   | -34.3 ± 20.3 (10) | 0.790   | 0.941            | D          |
| CYP2C9  | rs1799853  | c.430C>T        | missense                  | -37.9 ± 20.2 (30)   | -31.2 ± 18.3 (9)  | 0.360   | 1.000            | 1.0        |
| CYP3A5  | rs776746   | g.99270539C>T   | splicing<br>nonframeshift | -33.8 ± 26 (3)      | -36.6 ± 19.6 (36) | 0.870   | 0.946            | D          |
| SLC22A1 | rs72552763 | c.1258_1260del  | deletion                  | -37.4 ± 15.6 (19)   | -29.5 ± 21.4 (6)  | 0.432   | 1.000            | D          |
|         | rs12208357 | c.181C>T        | missense                  | -36.4 ± 17.5 (22)   | -29.5 ± 14.2 (3)  | 0.503   | 1.000            | 0.6        |
| SLCO1B1 | rs4149056  | c.521T>C        | missense                  | -35.4 ± 19.2 (27)   | -38.6 ± 21.6 (12) | 0.668   | 0.903            | 0.8        |
| SLCO1B3 | rs60140950 | c.683G767G>C    | missense                  | -37.1 ± 18.4 (20)   | -29.3 ± 8.3 (5)   | 0.178   | 1.000            | 1.0        |

FH patients carrying the homozygous form of the minor allele (AA) were grouped with the heterozygous carriers (RA) and compared with non-carriers (RR). Continuous variables are shown as mean ± SD and were compared by *t*-test. The p-value was adjusted using the Benjamini-Hochberg correction. *In silico* functionality prediction was performed either using the functionality prediction score (FPS) for missense variants or dbNSFP v4.2 *in silico* algorithm for splice variants. Frameshift variants were considered deleterious. Nonframeshift variants were considered potentially deleterious. NT nucleotide; D: deleterious; FPS: Functionality prediction score; N: neutral.

**Table S11** Influence of variants in PK-related genes in genetic and non-genetic variables on LDL-c reduction in FH patients: Univariate linear regression analysis.

| Variant                        |                  | $\beta$ | SE   | <i>p</i> -value  | Adjusted <i>p</i> -value |
|--------------------------------|------------------|---------|------|------------------|--------------------------|
| <b>Deleterious variants</b>    |                  |         |      |                  |                          |
| <i>CYP2C19</i> *9 c.431G>A     | A allele         | 14.4    | 10.2 | 0.159            | 0.520                    |
| <i>CYP2C8</i> c.486C>G         | A allele         | 4.2     | 7.4  | 0.570            | 0.855                    |
| <i>CYP2C8</i> g.5932A>G        | G allele         | 1       | 4.2  | 0.813            | 0.915                    |
| <i>CYP2C9</i> c.430C>T         | T allele         | 4.2     | 7.4  | 0.570            | 0.606                    |
| <i>CYP2C9</i> c.752A>G         | G allele         | 5.2     | 4.9  | 0.286            | 0.859                    |
| <i>CYP2D6</i> c.941G>A         | A allele         | -5.7    | 8.9  | 0.525            | 0.862                    |
| <i>CYP2D6</i> c.100C>T         | T allele         | -4.2    | 7.0  | 0.551            | 0.940                    |
| <i>CYP2D6</i> g.6866G>A        | A allele         | 11.3    | 10.2 | 0.270            | 0.608                    |
| <i>CYP3A5</i> c.624G>A         | A allele         | -1.2    | 6.7  | 0.862            | 0.912                    |
| <i>CYP3A5</i> c.423A>G         | G allele         | -1.3    | 5.7  | 0.827            | 0.924                    |
| <i>CYP3A5</i> *3 g.12083G>A    | A allele         | 4.6     | 7.6  | 0.684            | 0.504                    |
| <i>UGT1A3</i> c.808A>G         | G allele         | -2.9    | 11.8 | 0.182            | 0.504                    |
| <i>ABCC1</i> c.2012G>T         | T allele         | -18.8   | 7.7  | <b>0.016</b>     | <b>0.096</b>             |
| <i>ABCC2</i> c.3872C>T         | T allele         | 14.7    | 8.3  | 0.082            | 0.328                    |
| <i>ABCC2</i> c.3542G>T         | T allele         | 4.5     | 9.2  | 0.625            | 0.900                    |
| <i>ABCC3</i> c.3890G>A         | A allele         | -2.5    | 6.2  | 0.685            | 0.881                    |
| <i>SLC15A1</i> c.364G>A        | A allele         | 0.2     | 11.8 | 0.987            | 0.987                    |
| <i>SLC22A1</i> c.181C>T        | T allele         | 3       | 8.5  | 0.726            | 0.901                    |
| <i>SLC22A1</i> c.113G>A        | A allele         | -12.5   | 10.2 | 0.224            | 0.538                    |
| <i>SLC22A1</i> c.1260_1262del  | Deletion         | 3.1     | 4.4  | 0.485            | 0.831                    |
| <i>SLCO1B1</i> *5 c.521T>C     | C allele         | -2.1    | 4.4  | 0.641            | 0.888                    |
| <i>SLCO1B1</i> c.1463G>C       | C allele         | 2.7     | 9.9  | 0.784            | 0.941                    |
| <i>SLCO1B3</i> c.767G>C        | C allele         | -4.1    | 4.8  | 0.396            | 0.750                    |
| <b>Treatment</b>               |                  |         |      |                  |                          |
| Baseline LDL-c                 |                  | -0.1    | 0.02 | <b>&lt;0.001</b> | <b>&lt;0.001</b>         |
| High intensity treatment       |                  | -15.8   | 5.0  | <b>0.002</b>     | <b>0.024</b>             |
| Atorvastatin                   |                  | -7.3    | 5.9  | 0.218            | 0.561                    |
| Rosuvastatin                   |                  | -16.4   | 8.0  | <b>0.043</b>     | 0.193                    |
| Ezetimibe                      |                  | -8.8    | 3.7  | <b>0.018</b>     | <b>0.090</b>             |
| Drug interactions              | CYP3A4 inhibitor | -8.9    | 6.4  | 0.164            | 0.590                    |
| SRAE                           | Presence         | -11.8   | 4.3  | <b>0.007</b>     | <b>0.063</b>             |
|                                | Myopathy         | -11.8   | 4.7  | 0.014            | 0.101                    |
| Reduced adherence              |                  | 14.4    | 10.2 | 0.159            | 0.919                    |
| <b>Patient characteristics</b> |                  |         |      |                  |                          |
| Age                            |                  | 0.11    | 0.1  | 0.391            | 0.834                    |
| Gender                         | Male             | -3.3    | 4.0  | 0.413            | 0.834                    |
| Ethnics                        | Brown            | 7.2     | 4.3  | 0.099            | 0.317                    |
|                                | Black            | -0.4    | 5.6  | 0.942            | 0.972                    |
| Type 2 diabetes                |                  | -2.8    | 4.5  | 0.525            | 0.859                    |
| BMI                            |                  | 1.44    | 0.4  | <b>&lt;0.001</b> | <b>&lt;0.001</b>         |
| FH-related variant             | Carrier          | -4.2    | 3.9  | 0.288            | 0.627                    |

$\beta$ : linear coefficient; SE: standard error; BMI: body mass index; FH: familial hypercholesterolemia; LDL-c: low-density lipoprotein cholesterol; SRAE: statin-related adverse events. P-value was adjusted using the Benjamini-Hochberg correction.

**Table S12** Influence of deleterious variants (MAF > 1.0%) on LDL-c response to statins in FH patients: Multivariate linear regression analysis.

| Variant                       |          | n   | $\beta$ | SE   | <i>p-value</i> |
|-------------------------------|----------|-----|---------|------|----------------|
| <i>CYP2C19</i> c.431G>A       | A allele | 92  | 14.4    | 8.7  | 0.101          |
| <i>CYP2C8</i> c.486C>G        | A allele | 92  | -2.2    | 6.5  | 0.737          |
| <i>CYP2C8</i> g.5932A>G       | G allele | 92  | 0.6     | 3.7  | 0.863          |
| <i>CYP2C9</i> *2 c.430C>T     | T allele | 114 | 2.3     | 4.2  | 0.595          |
| <i>CYP2C9</i> *9 c.752A>G     | G allele | 114 | 9       | 7.5  | 0.232          |
| <i>CYP2D6</i> c.941G>A        | A allele | 92  | -6.5    | 6.0  | 0.281          |
| <i>CYP2D6</i> c.100C>T        | T allele | 92  | -6.4    | 5.8  | 0.272          |
| <i>CYP2D6</i> g.6866G>A       | A allele | 92  | 0.3     | 90.  | 0.974          |
| <i>CYP3A5</i> c.624G>A        | A allele | 114 | -1.3    | 8.1  | 0.873          |
| <i>CYP3A5</i> c.423A>G        | G allele | 114 | -2.1    | 4.9  | 0.669          |
| <i>CYP3A5</i> *3 g.12083G>A   | A allele | 114 | 4.7     | 6.4  | 0.463          |
| <i>UGT1A3</i> c.808A>G        | G allele | 92  | -11.3   | 10.3 | 0.274          |
| <i>ABCC1</i> c.2012G>T        | T allele | 92  | -11.5   | 6.7  | 0.092          |
| <i>ABCC2</i> c.3872C>T        | T allele | 92  | 12.2    | 7.2  | 0.095          |
| <i>ABCC2</i> c.3542G>T        | T allele | 92  | 3.6     | 8.0  | 0.656          |
| <i>ABCC3</i> c.3890G>A        | A allele | 92  | -2.0    | 5.3  | 0.710          |
| <i>SLC15A1</i> c.364G>A       | A allele | 92  | -11.8   | 10.3 | 0.253          |
| <i>SLC22A1</i> c.181C>T       | T allele | 92  | -2.3    | 7.3  | 0.757          |
| <i>SLC22A1</i> c.113G>A       | A allele | 92  | -10.3   | 8.8  | 0.247          |
| <i>SLC22A1</i> c.1260_1262del | Deletion | 92  | -1.4    | 4.0  | 0.720          |
| <i>SLCO1B1</i> *5 c.521T>C    | C allele | 114 | -3.3    | 3.7  | 0.365          |
| <i>SLCO1B1</i> c.1463G>C      | C allele | 114 | 3.1     | 8.1  | 0.701          |
| <i>SLCO1B3</i> c.767G>C       | C allele | 92  | -6.3    | 4.3  | 0.150          |

Each model was adjusted with the following covariates: body mass index, baseline LDL-c, therapy intensity, and presence of SRAE. n: number of patients;  $\beta$ : linear coefficient; SE: standard error; LDL-c: low-density lipoprotein cholesterol; FH: familial hypercholesterolemia; SRAE: statin-related adverse events.

**Table S13** Association of variants in PK-related genes and non-genetic variables with statin response in FH patients: Univariate logistic regression analysis.

| Variable                       |                  | RE, %<br>(58) | NRE, %<br>(56) | OR (95%CI)         | <i>p</i> -value | Adjusted <i>p</i> -value |
|--------------------------------|------------------|---------------|----------------|--------------------|-----------------|--------------------------|
| <b>Deleterious variants</b>    |                  |               |                |                    |                 |                          |
| <i>CYP2C19</i> *9 c.431G>A     | A allele         | 2.2 (1)       | 6.4 (3)        | 3.0 (0.4 - 61.9)   | 0.349           | 0.785                    |
| <i>CYP2C8</i> c.486C>G         | A allele         | 4.4 (2)       | 12.8 (6)       | 3.1 (0.7 - 22.3)   | 0.175           | 0.700                    |
| <i>CYP2C8</i> g.5932A>G        | G allele         | 44.4 (20)     | 42.6 (20)      | 0.9 (0.4 - 2.1)    | 0.855           | 0.993                    |
| <i>CYP2C9</i> c.430C>T         | T allele         | 12.1 (7)      | 21.4 (12)      | 2.0 (0.7 - 5.8)    | 0.185           | 0.666                    |
| <i>CYP2C9</i> c.752A>G         | G allele         | 5.2 (3)       | 3.6 (2)        | 0.7 (0.1 - 4.3)    | 0.678           | 0.939                    |
| <i>CYP2D6</i> c.941G>A         | A allele         | 11.1 (5)      | 8.5 (4)        | 0.7 (0.2 - 3)      | 0.676           | 0.973                    |
| <i>CYP2D6</i> c.100C>T         | T allele         | 11.1 (5)      | 10.6 (5)       | 1.0 (0.2 - 3.7)    | 0.942           | 1.000                    |
| <i>CYP2D6</i> g.6866G>A        | A allele         | 2.2 (1)       | 6.4 (3)        | 3.0 (0.4 - 61.9)   | 0.349           | 0.739                    |
| <i>CYP3A5</i> c.624G>A         | A allele         | 3.4 (2)       | 3.6 (2)        | 1.0 (0.1 - 8.9)    | 0.972           | 1.000                    |
| <i>CYP3A5</i> c.423A>G         | G allele         | 10.3 (6)      | 12.5 (7)       | 1.2 (0.4 - 4.1)    | 0.718           | 0.909                    |
| <i>CYP3A5</i> *3 g.12083G>A    | A allele         | 93.1 (54)     | 94.6 (53)      | 1.3 (0.3 - 6.9)    | 0.733           | 0.880                    |
| <i>UGT1A3</i> c.808A>G         | G allele         | 4.4 (2)       | 2.1 (1)        | 0.5 (0.0 - 5)      | 0.541           | 0.885                    |
| <i>ABCC1</i> c.2012G>T         | T allele         | 15.6 (7)      | 0.0 (0)        | -                  | -               | -                        |
| <i>ABCC2</i> c.3872C>T         | T allele         | 2.2 (1)       | 10.6 (5)       | 5.2 (0.8 - 102.6)  | 0.138           | 0.475                    |
| <i>ABCC2</i> c.3542G>T         | T allele         | 4.4 (2)       | 6.4 (3)        | 1.5 (0.2 - 11.5)   | 0.683           | 0.921                    |
| <i>ABCC3</i> c.3890G>A         | A allele         | 13.3 (6)      | 12.8 (6)       | 1.0 (0.3 - 3.3)    | 0.936           | 1.000                    |
| <i>SLC15A1</i> c.364G>A        | A allele         | 4.4 (2)       | 2.1 (1)        | 0.5 (0 - 5)        | 0.541           | 0.927                    |
| <i>SLC22A1</i> c.181C>T        | T allele         | 4.4 (2)       | 8.5 (4)        | 2 (0.4 - 15)       | 0.437           | 0.874                    |
| <i>SLC22A1</i> c.113G>A        | A allele         | 6.7 (3)       | 2.1 (1)        | 0.3 (0 - 2.5)      | 0.311           | 0.746                    |
| <i>SLC22A1</i> c.1260_1262del  | Deletion         | 31.1 (14)     | 38.3 (18)      | 1.4 (0.6 - 3.3)    | 0.470           | 0.891                    |
| <i>SLCO1B1</i> *5 c.521T>C     | C allele         | 24.1 (14)     | 19.6 (11)      | 0.8 (0.3 - 1.9)    | 0.563           | 0.844                    |
| <i>SLCO1B1</i> c.1463G>C       | C allele         | 3.4 (2)       | 3.6 (2)        | 1 (0.1 - 8.9)      | 0.972           | 1.000                    |
| <i>SLCO1B3</i> c.767G>C        | C allele         | 26.7 (12)     | 23.4 (11)      | 0.8 (0.3 - 2.2)    | 0.718           | 0.891                    |
| <b>Treatment</b>               |                  |               |                |                    |                 |                          |
| Baseline LDL-c (mg/dL)         |                  | 275 ± 90      | 226 ± 61       | 0.99 (0.98 - 0.99) | <b>0.002</b>    | <b>0.024</b>             |
| High intensity treatment       |                  | 93.1 (54)     | 78.6 (44)      | 0.3 (0.1 - 0.8)    | <b>0.033</b>    | 0.198                    |
| Atorvastatin                   |                  | 77.6 (45)     | 82.1 (46)      | 1.3 (0.5 - 3.4)    | 0.545           | 0.853                    |
| Rosuvastatin                   |                  | 13.8 (8)      | 5.4 (3)        | 0.4 (0.1 - 1.3)    | 0.141           | 0.634                    |
| Ezetimibe                      |                  | 46.6 (27)     | 26.8 (15)      | 0.4 (0.2 - 0.9)    | <b>0.030</b>    | 0.216                    |
| Drug interaction               | CYP3A4 inhibitor | 13.2 (7)      | 6.7 (3)        | 0.5 (0.1 - 1.8)    | 0.295           | 1.000                    |
| SRAE                           |                  | 29.3 (17)     | 3.6 (2)        | 0.1 (0 - 0.3)      | <b>0.002</b>    | <b>0.036</b>             |
| Myopathy                       |                  | 34.5 (20)     | 7.3 (4)        | 0.1 (0 - 0.4)      | <b>0.001</b>    | <b>0.036</b>             |
| Reduced adherence              |                  | 17.2 (10)     | 14.5 (8)       | 0.8 (0.3 - 2.2)    | 0.696           | 0.895                    |
| <b>Patient characteristics</b> |                  |               |                |                    |                 |                          |
| Age                            |                  | 53.3 ± 14.9   | 56.7 ± 13.9    | 1.0 (0.99 - 1.04)  | 0.215           | 0.645                    |
| Male gender                    |                  | 31.0 (18)     | 25.0 (14)      | 0.7 (0.3 - 1.7)    | 0.474           | 0.853                    |
| Ethnics                        | Brown + black    | 46.6 (27)     | 58.9 (33)      | 1.5 (0.7 - 3.4)    | 0.288           | 0.741                    |
| BMI (kg/cm <sup>2</sup> )      |                  | 26.9 ± 3.5    | 29.2 ± 5.0     | 1.1 (1.04 - 1.26)  | <b>0.009</b>    | <b>0.081</b>             |
| Type 2 diabetes                |                  | 25.9 (15)     | 16.7 (9)       | 0.6 (0.2 - 1.4)    | 0.220           | 0.660                    |
| FH-related variant             | Carrier          | 34.5 (20)     | 26.8 (15)      | 0.7 (0.3 - 1.5)    | 0.374           | 0.792                    |

Number of patients in round brackets. Categorical variables are expressed as percentage and number between brackets. Continuous variables are expressed as mean and standard deviation. P-value was adjusted using the Benjamini-Hochberg correction with a FDR of 10%. NRE: non-responder; RE: responder; OR: odds ratio; CI: confidence interval; BMI: body mass index; FH: familial hypercholesterolemia; LDL-c: low-density lipoprotein cholesterol; NR: not reported (No patients in NRE group); SRAE: statin-related adverse events.



**Table S14** Association of deleterious variants (MAF> 1.0%) in PK-related genes with statin response in FH patients: Multivariate logistic regression analysis.

| Variable                      |          | RE, %<br>(58) | NRE, %<br>(56) | OR (95%CI)           | p-value |
|-------------------------------|----------|---------------|----------------|----------------------|---------|
| <i>CYP2C19</i> c.431G>A       | A allele | 2.2 (1)       | 6.4 (3)        | 2.58 (0.30 - 54.78)  | 0.428   |
| <i>CYP2C8</i> c.486C>G        | A allele | 4.4 (2)       | 12.8 (6)       | 1.81 (0.33 - 14.3)   | 0.520   |
| <i>CYP2C8</i> g.5932A>G       | G allele | 44.4 (20)     | 42.6 (20)      | 0.87 (0.33 - 2.26)   | 0.772   |
| <i>CYP2C9</i> *2 c.430C>T     | T allele | 12.1 (7)      | 21.4 (12)      | 1.65 (0.48 - 6.14)   | 0.437   |
| <i>CYP2C9</i> *9 c.752A>G     | G allele | 5.2 (3)       | 3.6 (2)        | 4.49 (0.38 - 56.46)  | 0.225   |
| <i>CYP2D6</i> c.941G>A        | A allele | 11.1 (5)      | 8.5 (4)        | 0.41 (0.07 - 2.1)    | 0.287   |
| <i>CYP2D6</i> c.100C>T        | T allele | 11.1 (5)      | 10.6 (5)       | 0.4 (0.08 - 1.99)    | 0.260   |
| <i>CYP2D6</i> g.6866G>A       | A allele | 2.2 (1)       | 6.4 (3)        | 1.09 (0.1 - 25.79)   | 0.948   |
| <i>CYP3A5</i> c.624G>A        | A allele | 3.4 (2)       | 3.6 (2)        | 0.95 (0.08 - 12.82)  | 0.968   |
| <i>CYP3A5</i> c.423A>G        | G allele | 10.3 (6)      | 12.5 (7)       | 0.99 (0.25 - 4.01)   | 0.986   |
| <i>CYP3A5</i> *3 g.12083G>A   | A allele | 93.1 (54)     | 94.6 (53)      | 0.86 (0.11 - 6.38)   | 0.881   |
| <i>UGT1A3</i> c.808A>G        | G allele | 4.4 (2)       | 2.1 (1)        | 0.13 (0 - 1.95)      | 0.166   |
| <i>ABCC1</i> c.2012G>T        | T allele | 15.6 (7)      | 0.0 (0)        | NR                   | -       |
| <i>ABCC2</i> c.3872C>T        | T allele | 2.2 (1)       | 10.6 (5)       | 7.58 (0.81 - 199.03) | 0.123   |
| <i>ABCC2</i> c.3542G>T        | T allele | 4.4 (2)       | 6.4 (3)        | 1.15 (0.13 - 12.74)  | 0.903   |
| <i>ABCC3</i> c.3890G>A        | A allele | 13.3 (6)      | 12.8 (6)       | 0.95 (0.24 - 3.96)   | 0.946   |
| <i>SLC15A1</i> c.364G>A       | A allele | 4.4 (2)       | 2.1 (1)        | 0.1 (0 - 1.33)       | 0.098   |
| <i>SLC22A1</i> c.181C>T       | T allele | 4.4 (2)       | 8.5 (4)        | 1.34 (0.19 - 12.57)  | 0.776   |
| <i>SLC22A1</i> c.113G>A       | A allele | 6.7 (3)       | 2.1 (1)        | 0.44 (0.02 - 4.02)   | 0.504   |
| <i>SLC22A1</i> c.1260_1262del | Deletion | 31.1 (14)     | 38.3 (18)      | 0.88 (0.31 - 2.5)    | 0.813   |
| <i>SLCO1B1</i> *5 c.521T>C    | C allele | 24.1 (14)     | 19.6 (11)      | 0.62 (0.2 - 1.84)    | 0.391   |
| <i>SLCO1B1</i> c.1463G>C      | C allele | 3.4 (2)       | 3.6 (2)        | 1.75 (0.12 - 22.02)  | 0.657   |
| <i>SLCO1B3</i> c.767G>C       | C allele | 26.7 (12)     | 23.4 (11)      | 0.62 (0.18 - 1.98)   | 0.418   |

Each model was adjusted with the following covariates: body mass index, baseline LDL-c, therapy intensity, and presence of SRAE. Number of patients in round brackets. NRE: non-responder; RE: responder; OR: odds ratio; CI: confidence interval; FH: familial hypercholesterolemia; NR: not reported (no patients in NRE group); PK: pharmacokinetics; SRAE: statin-related adverse events.

**Table S15** Association of variants in PK-related genes and non-genetic variables with SRAE in FH patients: Univariate logistic regression analysis.

| Variant                        |                  | No SRAE<br>(n= 89) | SRAE<br>(n=24) | OR (95%CI)        | p-value      | Adjusted<br>p-value |
|--------------------------------|------------------|--------------------|----------------|-------------------|--------------|---------------------|
| <b>Deleterious variants</b>    |                  |                    |                |                   |              |                     |
| <i>CYP2C8</i> c.486C>G         | A allele         | 45.5 (35)          | 35.7 (5)       | 0.7 (0.2 - 2.1)   | 0.501        | 0.895               |
| <i>CYP2C9</i> *2 c.430C>T      | T allele         | 16.9 (15)          | 12.5 (3)       | 0.7 (0.2 - 2.4)   | 0.606        | 0.947               |
| <i>CYP2C9</i> *3 c.752A>G      | G allele         | 2.2 (2)            | 12.5 (3)       | 6.2 (1 - 49.5)    | 0.053        | 0.331               |
| <i>CYP3A5</i> c.624G>A         | A allele         | 3.4 (3)            | 4.2 (1)        | 1.2 (0.1 - 10.3)  | 0.852        | 0.926               |
| <i>CYP3A5</i> c.423A>G         | G allele         | 11.2 (10)          | 12.5 (3)       | 1.1 (0.2 - 4.1)   | 0.863        | 0.932               |
| <i>CYP3A5</i> *3 g.12083G>A    | A allele         | 93.3 (83)          | 95.8 (23)      | 1.7 (0.3 - 32.2)  | 0.646        | 0.950               |
| <i>ABCC1</i> c.2012G>T         | T allele         | 6.5 (5)            | 14.3 (2)       | 2.4 (0.3 - 12.6)  | 0.327        | 0.743               |
| <i>ABCC2</i> c.3872C>T         | T allele         | 5.2 (4)            | 14.3 (2)       | 3.0 (0.4 - 17.5)  | 0.227        | 0.568               |
| <i>ABCC2</i> c.3542G>T         | T allele         | 5.2 (4)            | 7.1 (1)        | 1.4 (0.1 - 10.5)  | 0.770        | 1.000               |
| <i>ABCC3</i> c.3890G>A         | A allele         | 13 (10)            | 14.3 (2)       | 1.1 (0.2 - 5)     | 0.895        | 0.932               |
| <i>SLC22A1</i> c.113G>A        | A allele         | 3.9 (3)            | 7.1 (1)        | 1.9 (0.1 - 16.2)  | 0.591        | 0.985               |
| <i>SLC22A1</i> c.1260_1262del  | Deletion         | 37.7 (29)          | 14.3 (2)       | 0.3 (0 - 1.1)     | 0.107        | 0.446               |
| <i>SLCO1B1</i> *5 c.521T>C     | C allele         | 21.3 (19)          | 25 (6)         | 1.2 (0.4 - 3.4)   | 0.702        | 0.975               |
| <i>SLCO1B1</i> c.1463G>C       | C allele         | 3.4 (3)            | 4.2 (1)        | 1.2 (0.1 - 10.3)  | 0.852        | 0.968               |
| <i>SLCO1B3</i> c.767G>C        | C allele         | 26 (20)            | 14.3 (2)       | 0.5 (0.1 - 1.9)   | 0.356        | 0.742               |
| <b>Treatment</b>               |                  |                    |                |                   |              |                     |
| Baseline LDL-c (mg/dL)         |                  | 240 ± 75           | 296 ± 90       | 1 (1.00 - 1.01)   | <b>0.004</b> | <b>0.033*</b>       |
| High intensity treatment       |                  | 84.3 (75)          | 91.7 (22)      | 2.1 (0.5 - 13.7)  | 0.365        | 0.702               |
| Atorvastatin                   |                  | 83.1 (74)          | 66.7 (16)      | 0.4 (0.1 - 1.2)   | 0.081        | 0.405               |
| Rosuvastatin                   |                  | 7.9 (7)            | 16.7 (4)       | 2.3 (0.6 - 8.6)   | 0.207        | 0.575               |
| Ezetimibe                      |                  | 32.6 (29)          | 50 (12)        | 2.1 (0.8 - 5.2)   | 0.119        | 0.425               |
| Drug interaction               | CYP3A4 inhibitor | 5.6 (5)            | 20.8 (5)       | 4.4 (1.1 - 17.4)  | <b>0.029</b> | 0.196               |
| Reduced adherence              |                  | 10.1 (9)           | 37.5 (9)       | 5.3 (1.8 - 16)    | <b>0.002</b> | 0.050               |
| <b>Patient characteristics</b> |                  |                    |                |                   |              |                     |
| Age                            |                  | 55.1 ± 14.4        | 55.9 ± 13.6    | 1 (0.97- 1.03)    | 0.822        | 1.027               |
| Gender                         | Male             | 27 (24)            | 29.2 (7)       | 1.1 (0.4 - 2.9)   | 0.830        | 0.988               |
| Ethnics                        | Brown + Black    | 46.1 (35)          | 45.8 (11)      | 1.0 (0.4 - 2.5)   | 0.985        | 0.985               |
| BMI                            |                  | 28.4 ± 4.7         | 26.8 ± 3.4     | 0.9 (0.81 - 1.02) | 0.134        | 0.419               |
| FH-related variant             | Carrier          | 22.5 (20)          | 54.2 (13)      | 4.1 (1.6 - 10.7)  | <b>0.004</b> | 0.050               |

Number of patients in round brackets. P-value was adjusted using the Benjamini-Hochberg correction. NRE: non-responder; RE: responder; OR: odds ratio; CI: confidence interval; BMI: body mass index; FH: familial hypercholesterolemia; LDL-c: low-density lipoprotein cholesterol; NR: not reported (No patients in NRE group); SRAE: statin-related adverse events.
